# Supplementary material for: Early Pharmacodynamic Changes Measured Using RNA Sequencing of Peripheral Blood from Patients in a Phase I Study with Mitazalimab, a Potent CD40 Agonistic Monoclonal Antibody
Source: MDPI journal article supplement (doi:10.3390/cells12192365), 2023-09-27
Supplement: s1 [file s1]

**Table S3.** Patient characteristics stratified on patient group.

|                                    |                    | Patient group 1 | Patient group 2 | <i>p</i> |
|------------------------------------|--------------------|-----------------|-----------------|----------|
| <i>n</i>                           |                    | 9               | 13              |          |
| Dose (µg/kg), n (%)                | 600                | 5 (55.6)        | 6 (46.2)        | 1.000    |
|                                    | 900                | 4 (44.4)        | 7 (53.8)        |          |
| Cancer type, n (%)                 | Adrenal            | 0 (0.0)         | 1 (7.7)         | 0.418    |
|                                    | Breast             | 1 (11.1)        | 2 (15.4)        |          |
|                                    | Cervical           | 1 (11.1)        | 1 (7.7)         |          |
|                                    | Cholangiocarcinoma | 1 (11.1)        | 2 (15.4)        |          |
|                                    | Colorectal         | 0 (0.0)         | 3 (23.1)        |          |
|                                    | Melanoma           | 1 (11.1)        | 0 (0.0)         |          |
|                                    | NSCLC              | 0 (0.0)         | 1 (7.7)         |          |
|                                    | Pancreas           | 2 (22.2)        | 0 (0.0)         |          |
|                                    | Rectal             | 0 (0.0)         | 1 (7.7)         |          |
|                                    | Renal              | 1 (11.1)        | 0 (0.0)         |          |
|                                    | Salivary gland     | 0 (0.0)         | 1 (7.7)         |          |
|                                    | Sarcoma            | 1 (11.1)        | 1 (7.7)         |          |
|                                    | Testicular         | 1 (11.1)        | 0 (0.0)         |          |
| Age (median (IQR))                 |                    | 62 (55, 66)     | 53 (49, 56)     | 0.115    |
| Sex, n (%)                         | Female             | 5 (55.6)        | 7 (53.8)        | 1.000    |
|                                    | Male               | 4 (44.4)        | 6 (46.2)        |          |
| Prior lines of treatment,<br>n (%) | 0-4                | 9 (100)         | 8 (61.5)        | 0.054    |
|                                    | > 4                | 0 (0)           | 5 (38.5)        |          |
|                                    | Median (range)     | 3 (2-4)         | 3 (0-9)         |          |

\* NSCLC: non-small cell lung cancer
