# Supplementary material for: Early Pharmacodynamic Changes Measured Using RNA Sequencing of Peripheral Blood from Patients in a Phase I Study with Mitazalimab, a Potent CD40 Agonistic Monoclonal Antibody
Source: Cells. 2023 Sep 27;12(19):2365. doi: 10.3390/cells12192365 (PMC10572020; doi:10.3390/cells12192365)
Supplement: Supplementary file 1 [file cells-12-02365-s001.zip]

Archive with 5 entries (5 files):
- Supplementary figures.pdf
- Table S1. DEG and enriched GO after mitazalimab treatment.xlsx
- Table S2. DEG between mitazalimab with or without CS pretreatment.xlsx
- Table S3. Patient characterisitcs based on patient group.pdf
- Table S4. ISG cMo gene list.xlsx
