# Supplementary material for: Early Pharmacodynamic Changes Measured Using RNA Sequencing of Peripheral Blood from Patients in a Phase I Study with Mitazalimab, a Potent CD40 Agonistic Monoclonal Antibody
Source: Cells. 2023 Sep 27;12(19):2365. doi: 10.3390/cells12192365 (PMC10572020; doi:10.3390/cells12192365)
Supplement: Supplementary file 1 [file cells-12-02365-s001.zip › Table S1. DEG and enriched GO after mitazalimab treatment.xlsx]

## Sheet: DEG
	DEG in patient 600 µg/kg				DEG in patient 900 µg/kg				Common DEG between 600 µg/kg and 900 µg/kg
	between C1D1 (pre-treatment) and C1D2 (24 hrs post treatment)				between C1D1 (pre-treatment) and C1D2 (24 hrs post treatment)
	Gene	log2FoldChange	padj		Gene	log2FoldChange	padj		Gene
	ANKRD22	4.02301	7.30921e-11		UBE2F-SCLY	7.85879	0.101499		ANKRD22
	CXCL10	3.87126	7.11567e-07		RAB4B-EGLN2	5.19384	0.00417285		CXCL10
	LAMP3	3.77961	6.41437e-07		VWA3B	4.69991	3.59268e-05		LAMP3
	FAP	3.71683	0.00127743		SHOX2	3.82458	3.95917e-05		FAP
	RSAD2	3.5089	2.47861e-07		DNAAF1	3.82203	0.000375298		RSAD2
	CD274	3.46009	1.71472e-09		CYP19A1	3.64369	0.000881807		CD274
	DNAAF1	3.44065	0.000265434		FAP	3.60497	1.16906e-07		TNFAIP6
	TNFAIP6	3.38211	2.68603e-10		HESX1	3.16232	0.025203		SLC51A
	WFDC1	3.26911	6.6142e-05		LAMP3	2.78721	0.000105206		PDCD1LG2
	SLC51A	3.16842	2.41558e-07		ANKRD22	2.77859	1.14898e-05		BATF2
	PDCD1LG2	3.03559	1.26373e-06		KCNJ10	2.76221	0.00142123		P2RY14
	BATF2	3.0325	9.03145e-07		RSAD2	2.6831	1.66444e-05		IDO1
	P2RY14	2.97751	4.46485e-06		TNFAIP6	2.68214	9.93466e-07		IFI44
	IDO1	2.96415	0.00102929		CD274	2.67472	6.1611e-08		SERPING1
	IFI44	2.92849	8.41739e-07		KIF26B	2.66804	0.00866083		CD177
	SERPING1	2.9204	5.45843e-07		C15orf48	2.64274	7.66289e-07		IFI44L
	CD177	2.90861	2.27513e-05		P2RY14	2.57906	8.85624e-05		ATF3
	IFI44L	2.90472	3.60135e-06		ZDHHC19	2.52523	1.4232e-12		FCGR1A
	ATF3	2.86214	4.08143e-05		SLC51A	2.50838	2.41257e-05		GBP6
	OLAH	2.84667	4.72687e-06		IDO1	2.48761	0.00206703		CMPK2
	ZDHHC19	2.79437	1.56893e-06		ADAMTS2	2.47914	0.016008		ETV7
	FCGR1A	2.76459	4.25104e-13		SLC52A1	2.44649	0.0070121		C4BPA
	GBP6	2.74434	1.39208e-06		CD177	2.43005	2.03489e-05		IFIT1
	CMPK2	2.68341	1.11454e-06		CXCL11	2.4139	0.0659387		GBP5
	ETV7	2.66454	1.47239e-05		MT1G	2.41081	0.0249121		CEACAM1
	C4BPA	2.64619	2.13339e-12		BATF2	2.38671	1.23494e-05		NRN1
	IFIT1	2.63832	4.65696e-06		CCL2	2.38647	0.00729047		CASP5
	VWA3B	2.63058	0.0116341		ETV7	2.36788	2.30058e-05		GBP1
	ADAMTS2	2.62307	0.0172813		GPR84	2.36633	4.44884e-08		HERC5
	GBP5	2.61103	7.95794e-06		METTL7B	2.3613	0.000735825		IFIT3
	CEACAM1	2.60117	3.95684e-12		PDCD1LG2	2.2939	1.07605e-07		GRIN3A
	NRN1	2.58624	3.18986e-06		TMEM54	2.28527	0.0192482		BCL2L14
	CASP5	2.56522	3.52835e-15		AP3B2	2.25172	3.97719e-05		OAS3
	GBP1	2.55371	1.32632e-06		FAM20A	2.25068	0.000712051		ISG15
	HERC5	2.55336	1.74712e-06		IFI44L	2.24741	0.000102933		ANXA3
	IFIT3	2.55019	8.13269e-07		SERPING1	2.23327	1.26794e-06		SOCS1
	HTRA4	2.546	0.000136018		SFRP1	2.21639	0.00108938		EFCAB2
	GPR84	2.53718	1.63333e-12		CMPK2	2.1991	8.39207e-06		IFI6
	CYP19A1	2.51316	0.00191803		TNFAIP8L3	2.19374	0.0686683		TRIM6
	GRIN3A	2.50389	1.03742e-07		IFI44	2.08975	0.000244118		IFIT2
	BCL2L14	2.50217	0.000185355		COL1A1	2.08208	0.00697845		AIM2
	SHOX2	2.48797	0.000989058		RBP4	2.06921	0.00336189		FGF13
	OAS3	2.48086	2.57003e-05		HERC5	2.06716	5.40783e-05		PLSCR1
	ISG15	2.47555	8.465e-05		IFIT1	2.05779	0.000117834		MED12L
	ANXA3	2.45305	6.888e-12		OAS3	2.04895	6.47675e-06		EXOC3L1
	CCL8	2.42902	0.0149708		GBP1	2.03533	1.99516e-05		TFEC
	CXCL11	2.42564	0.00760435		IFIT3	2.02013	7.72237e-06		GBP4
	SFRP1	2.41467	4.03849e-05		PLSCR4	1.99666	0.00692557		RGS1
	SOCS1	2.39889	9.98237e-05		CXCL10	1.98862	0.0209705		EIF2AK2
	EFCAB2	2.37014	2.81741e-09		EMP1	1.97933	2.82516e-11		TMEM252
	MT1G	2.36457	0.0464517		KLF5	1.97918	4.33238e-07		IL31RA
	S100A2	2.3523	0.0303758		RSPH9	1.95292	1.57167e-06		TTC26
	RSPH9	2.34051	1.70206e-08		CEACAM1	1.92428	4.28849e-06		APOL4
	IFI6	2.32408	6.68602e-06		FCGR1A	1.8945	3.75106e-08		DDX60
	TRIM6	2.31579	3.7235e-12		DNAH7	1.88142	0.0641235		TRIM22
	IFIT2	2.31324	5.12211e-07		DOCK4	1.86503	2.58462e-10		IFIT5
	AIM2	2.30725	1.4607e-11		IL27	1.85439	6.1611e-08		EGR3
	FGF13	2.30612	3.44467e-07		ATF3	1.85194	0.00164996		TNFSF13B
	PLSCR1	2.28782	2.28915e-14		FFAR3	1.85019	2.58462e-10		SPATC1
	SDK1	2.26655	0.000744444		GBP5	1.83085	9.90344e-05		PSTPIP2
	TNFAIP8L3	2.26498	0.00176566		PLSCR1	1.81078	2.58462e-10		TIFA
	IL27	2.26425	6.74133e-11		SYNPO2	1.80836	0.00611384		SCARF1
	CNTNAP3B	2.26211	0.0319594		ISG15	1.79139	0.00108415		CACNA1E
	PLSCR4	2.25032	0.0428343		MX1	1.77101	6.49749e-05		GK
	FFAR3	2.22525	1.44044e-09		CASP5	1.75486	2.13704e-09		XRN1
	MED12L	2.20213	5.40906e-08		EPSTI1	1.75407	4.31587e-05		B3GNT5
	EXOC3L1	2.17621	0.000662551		CCM2L	1.75064	0.00755156		FAS
	CFB	2.17224	1.33686e-05		IFIT2	1.74923	0.000140518		USP18
	CCL2	2.15747	0.00849129		IFIH1	1.7492	3.76118e-07		CD59
	EPSTI1	2.15672	1.92482e-05		CDHR5	1.74109	0.000172105		DDX60L
	NR2E1	2.15279	0.0415098		SOCS1	1.73836	0.0084179		FOSL1
	CHAC1	2.13323	0.00308973		NRN1	1.72731	2.85984e-05		GRAMD1B
	GALNT4	2.12281	0.0831167		SAMD9L	1.72574	2.67003e-08		LHFPL2
	TFEC	2.11999	3.86242e-07		BCL2L14	1.71833	0.0115729		G0S2
	DOCK4	2.08475	6.15242e-10		HCAR1	1.71658	0.00858312		LPCAT2
	GBP4	2.07001	0.000377971		EXOC3L1	1.71404	0.00412948		IGF2BP3
	RGS1	2.06568	2.83432e-05		GBP4	1.69405	0.000470364		IRF7
	SAMD9L	2.06117	6.50614e-08		TRIM6	1.69172	7.72237e-06		KCNJ2
	MX1	2.0596	5.79201e-05		IFI6	1.68052	0.000246096		SLC26A8
	EIF2AK2	2.05929	8.69045e-10		ANXA8	1.66209	0.0464164		APOL1
	TMEM252	2.04854	2.47313e-09		PTGER3	1.66082	0.0847188		VAMP5
	IL31RA	2.04181	0.000287496		IL1RN	1.65144	1.14486e-06		SAMD9
	TTC26	2.03528	1.48057e-05		EBI3	1.64551	0.00206304		KREMEN1
	APOL4	2.03263	0.00150425		C9orf152	1.64394	0.0237032		GBP3
	DDX60	2.01626	1.18673e-05		EIF2AK2	1.63935	1.8503e-06		NEXN
	TRIM22	2.01345	9.03083e-10		IFITM3	1.6327	8.05148e-09		TNFSF10
	CCL25	2.01255	0.00301155		GBP6	1.63244	1.66444e-05		RMI2
	IFIT5	2.00615	2.7511e-07		GCH1	1.61853	0.000329448		STK3
	EGR3	1.99614	2.72429e-06		RGS1	1.61704	0.0114388		CAPNS2
	TNFSF13B	1.99446	2.68603e-10		SLC1A3	1.61124	0.000217328		VPS9D1
	SPATC1	1.99234	3.78736e-05		PARP14	1.5985	1.26794e-06		SORT1
	KLF5	1.98229	4.21812e-07		RTP4	1.5966	0.000439067		BAZ1A
	PXT1	1.98005	0.00029509		AIM2	1.5965	1.01231e-07		HCAR3
	IFIH1	1.97635	3.67837e-07		TFEC	1.59374	0.00476951		IFITM1
	PSTPIP2	1.96088	1.23939e-08		C4BPA	1.59084	2.03489e-05		CLEC6A
	TIFA	1.95817	3.48863e-08		APOL4	1.58333	0.00108938		CA12
	TMEM54	1.95367	0.0117301		GRIN3A	1.58078	0.00080396		CYSTM1
	SCARF1	1.95243	5.79711e-08		IFI35	1.57376	1.45581e-06		STX11
	IFITM3	1.94354	1.26063e-08		DDX60	1.56738	0.000234531		SECTM1
	HCAR1	1.94256	1.45197e-05		HP	1.54121	0.000328085		ARL5B
	CACNA1E	1.93187	4.10607e-12		RAB39A	1.53492	0.0126087		TCN2
	GK	1.92684	6.41464e-12		CCNA1	1.52976	0.00132246		FRMD3
	PKD2L1	1.9169	0.000772425		FGF13	1.52553	0.0127159		BCL6
	C15orf48	1.91497	0.000613401		ANXA3	1.51779	1.35328e-05		OSM
	XRN1	1.91135	2.14706e-07		EGR3	1.51591	0.000769569		TIMM10
	B3GNT5	1.89583	5.79711e-08		FOXC1	1.51585	0.0750084		HCAR2
	IFI35	1.87825	4.39566e-05		GGT5	1.5027	0.0126249		SAT1
	CD300LD	1.87451	4.2907e-05		PGA5	1.49854	0.0119029		ZCCHC2
	FAS	1.87253	2.34885e-08		TRIM22	1.49235	9.50145e-07		JAK2
	USP18	1.86665	0.000945453		IL1B	1.47437	2.03613e-12		FAM8A1
	CD59	1.86603	1.5635e-10		XAF1	1.46937	6.54261e-06		AFF1
	DDX60L	1.85956	2.85262e-11		IFIT5	1.46872	3.93065e-05		IFI16
	FOSL1	1.84989	3.40716e-07		LAP3	1.46594	9.99454e-06		LIMK2
	GRAMD1B	1.84756	0.000336742		APOL6	1.4636	1.08536e-05		NMI
	RTP4	1.84538	0.000290133		XRN1	1.45922	2.03489e-05		TRIM25
	GCH1	1.84334	1.77976e-06		GRAMD1B	1.45436	6.23854e-05		LRRK2
	LHFPL2	1.84169	6.66939e-08		KIAA1958	1.44833	0.000139526		GBP2
	GK3P	1.83896	9.45321e-09		C2orf66	1.4452	0.0826529		NCOA7
	PARP14	1.83468	4.59816e-05		FBXO6	1.44006	7.58409e-07		NT5C3A
	APOL6	1.8304	1.07089e-06		ALDH1A2	1.43752	0.00554911		ISG20
	G0S2	1.82593	2.43735e-07		DDX60L	1.42872	2.4228e-07		APOL2
	LPCAT2	1.82342	8.20995e-11		OAS1	1.42689	1.60531e-05		UBE2F-SCLY
	IGF2BP3	1.82029	3.67067e-07		RETN	1.4123	0.000166703		VWA3B
	IRF7	1.80743	5.18534e-06		OASL	1.40358	0.00110517		SHOX2
	OASL	1.80281	0.000466886		SPATS2L	1.40239	0.00190421		DNAAF1
	ITGB8	1.79871	0.0181042		STAC	1.39841	0.0260569		CYP19A1
	CHMP5	1.79661	2.07944e-06		CACNA1E	1.39289	2.58462e-10		HESX1
	OAS1	1.79316	0.000101414		USP18	1.38797	0.0231378		KCNJ10
	KCNJ2	1.78571	1.52785e-13		FOSL1	1.38636	0.000606993		C15orf48
	HP	1.78503	6.3998e-06		LPCAT2	1.37796	3.65409e-06		ZDHHC19
	SLC26A8	1.7786	5.40955e-14		NBN	1.37675	3.99656e-06		ADAMTS2
	CPE	1.77391	0.00947366		TIFA	1.37378	0.000137961		CXCL11
	GSDMC	1.77123	0.0023393		ACOX2	1.37273	0.00380426		MT1G
	LAP3	1.76917	0.000116215		TNFSF13B	1.37152	5.43362e-07		CCL2
	APOL1	1.74697	0.000115629		EFCAB2	1.36938	1.66984e-05		GPR84
	KIAA1958	1.74287	1.56893e-06		IL31RA	1.36408	0.00203781		METTL7B
	VAMP5	1.74071	0.000277062		PARP9	1.36311	1.36078e-07		TMEM54
	FBXO6	1.7398	3.37697e-06		SCARF1	1.36159	6.08073e-07		AP3B2
	SAMD9	1.73591	7.23069e-07		APOL1	1.36019	2.02908e-05		FAM20A
	KREMEN1	1.73566	1.33707e-10		TTC26	1.35804	0.000147768		SFRP1
	GBP3	1.72188	1.20621e-05		IRAK2	1.35649	2.55952e-06		TNFAIP8L3
	ST8SIA5	1.71958	0.0404457		DISC1	1.35038	2.58462e-10		COL1A1
	FAM20A	1.71697	0.00316173		IRF7	1.34988	7.72237e-06		RBP4
	GLDN	1.71407	0.0626977		FAM124A	1.34977	0.0597186		PLSCR4
	NEXN	1.71325	4.78179e-08		NOS1AP	1.34729	0.0901901		EMP1
	SPATS2L	1.7096	0.00123608		GABRR2	1.34705	0.00508007		KLF5
	PRDM5	1.70405	3.39706e-08		TDRD7	1.34283	1.42131e-06		RSPH9
	KCNJ10	1.70086	0.0169556		LRRC70	1.34245	0.0208272		DOCK4
	HESX1	1.69633	0.0423536		LHFPL2	1.3416	1.66444e-05		IL27
	RETN	1.69224	1.20452e-06		ADM	1.33945	1.67042e-09		FFAR3
	TNFSF10	1.67998	3.38745e-07		FFAR2	1.32977	4.05071e-09		SYNPO2
	MAB21L3	1.67642	0.000105051		GK	1.32854	5.31e-06		MX1
	GNG10	1.67492	1.10988e-05		PML	1.32761	1.92041e-05		EPSTI1
	PML	1.67194	0.000620868		GBP3	1.32568	0.00204061		CCM2L
	GGT5	1.66901	0.00511936		PSTPIP2	1.32545	0.000117735		IFIH1
	RMI2	1.66555	0.00699355		FAS	1.32391	1.35328e-05		CDHR5
	ANXA8	1.66551	0.000109109		KRT7	1.32034	0.0568687		SAMD9L
	GABRR2	1.66519	2.51205e-07		MED12L	1.31888	0.00155904		HCAR1
	PARP9	1.66347	5.58812e-10		RNASE2	1.31781	9.32143e-05		ANXA8
	XAF1	1.66335	0.000844621		C3AR1	1.31715	3.69595e-08		IL1RN
	STK3	1.66281	3.0038e-11		EXOC3L2	1.30892	0.0845361		EBI3
	BMX	1.65439	6.75163e-08		IDO2	1.30755	0.0772465		C9orf152
	CAPNS2	1.65418	0.000121316		OAS2	1.30596	0.000116249		IFITM3
	RBP4	1.64931	0.00990341		SPESP1	1.29918	0.118636		GCH1
	LRRC70	1.64722	0.0192337		CCRL2	1.29811	4.64873e-06		SLC1A3
	VPS9D1	1.64024	5.58532e-08		SAMD9	1.2939	0.00031998		PARP14
	CCNA1	1.6392	6.00918e-05		SPAG6	1.29135	0.095156		RTP4
	SORT1	1.63791	3.42981e-09		PTGFR	1.28426	0.0635896		IFI35
	CCRL2	1.63609	3.98492e-06		STAT2	1.28211	2.41257e-05		HP
	FFAR2	1.62544	2.57995e-12		ZBP1	1.27818	5.38832e-05		RAB39A
	METTL7B	1.61369	0.00351812		UBE2L6	1.27226	5.17143e-05		CCNA1
	BAZ1A	1.61341	5.07681e-10		CSRNP1	1.26042	8.28696e-09		FOXC1
	S100A8	1.60929	4.42666e-05		STAT1	1.25729	2.68159e-05		GGT5
	SLC1A3	1.60872	9.84646e-07		TMEM252	1.2499	0.00115221		IL1B
	STAT2	1.60788	2.21317e-05		PCOLCE2	1.24963	0.0210093		XAF1
	HCAR3	1.60522	3.45509e-10		KCNJ2	1.24528	3.59268e-05		LAP3
	OAS2	1.6029	0.000912133		CLEC5A	1.24468	2.29664e-05		APOL6
	IFITM1	1.60217	1.64191e-07		TAP1	1.24181	3.96328e-06		KIAA1958
	CLEC6A	1.59754	0.00166864		HELZ2	1.23969	2.07979e-05		FBXO6
	ZBP1	1.59204	3.33515e-05		SERPINB2	1.23841	0.00148143		ALDH1A2
	ACSL4	1.59111	1.14312e-08		PIK3AP1	1.23413	4.8e-06		OAS1
	CLEC4D	1.59099	0.000112165		SOCS3	1.23155	3.15893e-05		RETN
	CA12	1.58835	0.0117947		SLC39A8	1.23093	0.0017805		OASL
	NBN	1.57801	2.63736e-07		GPD2	1.22626	1.2089e-05		SPATS2L
	ADM	1.5768	4.77729e-10		SEMA6B	1.22058	0.00125281		STAC
	CYSTM1	1.5743	2.43735e-07		TNFSF10	1.22017	0.000141553		NBN
	STX11	1.57385	5.95603e-09		SPINK8	1.21656	0.0352163		ACOX2
	SECTM1	1.57353	4.18517e-07		PHLDA2	1.21648	0.082034		PARP9
	RAB33B	1.56914	8.59686e-08		DAPP1	1.20958	2.08038e-05		IRAK2
	ARL5B	1.56838	6.00918e-05		CLEC6A	1.20275	0.100294		DISC1
	TCN2	1.56745	3.15333e-08		NEXN	1.20273	0.00137918		FAM124A
	FRMD3	1.56524	3.17657e-05		VSIG10	1.20264	0.000489393		GABRR2
	BCL6	1.56406	2.62158e-13		CLIC4	1.19762	2.33284e-05		TDRD7
	OSM	1.56343	2.16441e-09		RHBDF2	1.19452	2.06589e-07		LRRC70
	IL1RN	1.56262	1.5635e-10		OTOA	1.19422	0.119548		ADM
	TDRD7	1.55935	1.01512e-07		MDK	1.19204	0.00156954		FFAR2
	TAP1	1.55638	1.70365e-06		CYSTM1	1.19028	1.57167e-06		PML
	SOCS3	1.55244	2.35377e-06		GALNT3	1.18941	7.96251e-06		KRT7
	EBI3	1.54989	0.00236348		CCR1	1.18533	4.20872e-09		C3AR1
	TIMM10	1.54566	1.61726e-05		RPL3L	1.18105	0.135888		IDO2
	HCAR2	1.53601	2.7302e-11		SERPINB10	1.17952	0.00257906		OAS2
	PRSS8	1.53478	0.00972791		MT2A	1.17623	0.0125152		CCRL2
	LY96	1.52593	0.0036281		IFITM1	1.17612	9.20742e-07		STAT2
	DAPP1	1.5253	1.63147e-08		HCAR3	1.17237	1.62616e-05		ZBP1
	BCL2A1	1.52435	3.7114e-05		ACVRL1	1.17177	1.28724e-07		UBE2L6
	EBLN2	1.52071	4.30862e-05		HCAR2	1.16614	2.35814e-06		CSRNP1
	ZNF267	1.51474	1.13293e-05		ICAM1	1.16541	2.39854e-07		STAT1
	SMIM10	1.51066	0.0134269		SPATC1	1.16442	0.026337		CLEC5A
	SAT1	1.50667	2.98949e-09		SECTM1	1.15729	2.4228e-07		TAP1
	ZCCHC2	1.50118	2.60036e-06		TMEM255A	1.15698	0.0958796		HELZ2
	IL1B	1.49753	5.04877e-10		ZCCHC2	1.15623	8.79676e-06		SERPINB2
	NDUFC2-KCTD14	1.4961	0.00888884		ZNF257	1.15338	0.0895213		PIK3AP1
	VSIG10	1.49337	4.59816e-05		RNASE1	1.15259	0.00118881		SOCS3
	JAK2	1.48923	3.51642e-10		KREMEN1	1.15234	8.37209e-05		GPD2
	HPN	1.48698	0.00213231		ABTB2	1.14387	0.0274403		SEMA6B
	UBE2L6	1.48103	8.09287e-05		SORT1	1.14273	9.50145e-07		SPINK8
	FAM8A1	1.47171	6.88072e-07		PLAC8	1.14248	0.000105206		PHLDA2
	KCNJ15	1.47001	2.38795e-11		SCO2	1.14078	2.31147e-07		DAPP1
	AFF1	1.46569	1.50462e-08		LMNB1	1.13951	1.52703e-06		VSIG10
	PIK3AP1	1.4656	7.55126e-12		SIGLEC14	1.1387	1.55159e-06		CLIC4
	DISC1	1.46517	3.02238e-12		TOR1B	1.13746	9.52427e-05		RHBDF2
	IFI16	1.46335	2.35182e-09		SLPI	1.13525	3.12495e-05		MDK
	DYNLT1	1.46059	3.82761e-07		LURAP1L	1.13404	0.099763		GALNT3
	LIMK2	1.4566	7.08268e-09		CD276	1.13186	0.121415		CCR1
	HELZ2	1.45281	3.84864e-05		RNF213	1.13121	7.72237e-06		SERPINB10
	S100A12	1.45224	2.70224e-06		B3GNT5	1.1303	0.000363031		MT2A
	PIR	1.44588	0.0521812		MOV10	1.13005	0.000566363		ICAM1
	SERPINB10	1.43897	0.00155767		FRMD3	1.12908	0.001532		TMEM255A
	APOBEC3A	1.43871	4.29823e-10		IGF2BP3	1.12052	0.00713299		ABTB2
	ABTB2	1.4345	0.00073136		VPS9D1	1.11976	8.46523e-09		PLAC8
	NMI	1.43094	1.57502e-07		RBM11	1.11961	0.0710639		SCO2
	GALNT3	1.43093	1.42831e-08		HORMAD1	1.11826	0.0629457		LMNB1
	C9orf152	1.42838	0.0533359		AFF1	1.11529	1.14866e-06		SIGLEC14
	GPR17	1.42789	0.0266662		SERPINC1	1.11348	0.0513634		TOR1B
	SYNPO2	1.42473	0.00906285		LIMK2	1.11304	8.56235e-06		SLPI
	LY6G6C	1.42393	0.00179905		ANO5	1.11187	0.036462		CD276
	ICAM1	1.42157	4.77282e-07		DTX3L	1.1092	7.72237e-06		RNF213
	TRIM25	1.42121	1.23388e-12		BAZ1A	1.10546	0.000172454		MOV10
	STAT1	1.42079	8.00188e-07		TCN2	1.10464	1.23494e-05		HORMAD1
	TANK	1.42027	1.19531e-08		CSF2RB	1.10308	1.07605e-07		DTX3L
	TWIST2	1.41773	0.0729642		MAP2K6	1.09986	0.00129723		CSF2RB
	IL18R1	1.41655	5.36557e-07		TREML4	1.09875	0.044529		MAP2K6
	SCO2	1.41492	8.65267e-06		STX11	1.09728	1.45028e-05		MYOF
	LRRK2	1.41479	1.11547e-09		MYOF	1.09582	1.50082e-05		TRAFD1
	CCR1	1.41304	2.68415e-13		TRAFD1	1.09302	0.000309443		TLR5
	GPD2	1.41059	2.38563e-08		CA12	1.0928	0.0777636		GNB4
	GBP2	1.40893	6.33653e-07		STK3	1.09089	0.000258108		CDC42EP2
	NCOA7	1.40547	2.46e-05		TLR5	1.08882	0.000257827		PARP12
	ZBED6	1.40523	0.0459192		GNB4	1.08774	0.000737592		TNFAIP3
	SLK	1.40432	4.78754e-09		CDC42EP2	1.0874	3.69595e-08		DHX58
	HORMAD1	1.40382	0.00132874		PARP12	1.08642	0.000656102		RAB20
	CDHR5	1.40117	0.00219526		TNFAIP3	1.08252	6.4322e-07		SCN9A
	TMEM45A	1.4009	0.0214854		DHX58	1.08039	0.00203279		MMP8
	SKIL	1.39814	0.000152064		CD59	1.07867	1.23494e-05		TRIM5
	RNF213	1.39712	0.000221417		G0S2	1.07674	0.0150332		TAP2
	C3AR1	1.39434	5.27377e-11		BCL6	1.07461	7.45855e-06		EDNRB
	SLPI	1.39377	1.75693e-06		RAB20	1.07451	1.68029e-05		UBQLNL
	NT5C3A	1.39312	3.26555e-05		IFI16	1.07405	4.95849e-07		IGFBP2
	ISG20	1.38885	8.52474e-05		JAK2	1.07259	0.000221195		ACSL1
	IL1R1	1.38478	9.14036e-08		VAMP5	1.06567	0.00153372		PLOD2
	RCVRN	1.38364	0.00162345		SCN9A	1.06518	0.00495397		LACTB
	CSF2RB	1.37981	1.52785e-13		CAPNS2	1.06395	0.00603232		MTHFD2
	DTX3L	1.37657	3.54967e-08		FAM8A1	1.06261	0.000464209		MX2
	NABP1	1.3762	2.20538e-10		SLC26A8	1.0611	5.40783e-05		MLKL
	MBOAT2	1.37617	7.30921e-11		NT5C3A	1.06022	0.00145648		HELB
	CARD16	1.37583	2.18952e-06		RGL1	1.05824	0.000375458		IGSF6
	CCL3L1	1.37567	0.00409464		MMP8	1.05817	0.000566363		ZC3HAV1
	PELI1	1.37367	6.15242e-10		TRIM5	1.0573	0.000101379		BRCA2
	TOR1B	1.37364	2.25915e-06		TAP2	1.05679	2.28166e-05		LILRA5
	CSRNP1	1.3707	2.6302e-11		RMI2	1.05639	0.0208272		SEC24D
	SRGN	1.36801	1.79102e-07		ISG20	1.05489	0.001871		NT5DC4
	TLR5	1.35856	1.64191e-07		EDNRB	1.05418	0.135473		ABCA1
	DGKH	1.35817	0.00395128		OSM	1.05415	3.12495e-05		SAMD4A
	SOD2	1.35799	2.59247e-08		UBQLNL	1.05351	0.00446601		CCDC78
	SNX10	1.35725	1.14965e-07		IGFBP2	1.05307	0.00667781		CTSF
	LGSN	1.35171	0.0395455		ACSL1	1.05195	0.000121604		DLG5
	LMNB1	1.35092	6.53898e-12		PLOD2	1.05136	0.0525666		PLCH2
	GNB4	1.35001	1.0128e-05		LRRK2	1.05131	5.51868e-05		ARVCF
	MYOF	1.34825	2.85818e-05		LACTB	1.04968	5.81411e-06		RPH3A
	IL18RAP	1.34758	4.25191e-08		NCOA7	1.04922	0.0178109		GPR153
	SAMSN1	1.3452	3.67067e-07		PPARG	1.04733	0.0280489		C16orf74
	ACOX2	1.34275	0.000538935		SERPINB9	1.0465	0.000177059		GNLY
	SLC22A4	1.34169	3.08312e-09		TRIM25	1.04638	1.76586e-06		RTKN
	FOXC1	1.34122	0.059635		ARL5B	1.04248	0.0208272		SLC4A10
	SCN9A	1.33952	9.90895e-05		GBP2	1.04209	2.34423e-05		GFPT2
	CCM2L	1.33948	0.0433143		MTHFD2	1.04134	0.00185972		NCAM1
	OLFML3	1.33558	0.0180329		MX2	1.04101	6.21587e-05		CD1C
	VCPIP1	1.33243	1.57885e-09		MLKL	1.03833	1.57167e-06		VIPR2
	C4BPB	1.33176	0.0390057		SAT1	1.03716	7.72237e-06		SYNPO
	COL1A1	1.32927	0.0507491		HELB	1.0346	0.0039493		GLB1L2
	RHBDF2	1.32896	5.52817e-05		IGSF6	1.03085	4.44884e-08		GFRA2
	ACSL1	1.32481	2.36479e-08		ZC3HAV1	1.02981	0.000104622		COLGALT2
	RAB20	1.32303	4.02866e-05		BRCA2	1.02472	0.0174864		KIR3DL1
	APOL2	1.32276	1.72548e-05		FAM72D	1.02364	0.0625944		PTGDR
	UBQLNL	1.32026	0.00290141		LILRA5	1.02307	1.35328e-05		SLC5A10
	RP2	1.31763	1.06194e-07		APOL2	1.02202	4.22813e-05		PAK6
	MOV10	1.31745	0.00821414		PI3	1.02138	0.000523681		SDK2
	MCTP2	1.31729	8.69045e-10		SLC12A8	1.02138	0.0364219		GATM
	IRAK2	1.31647	9.8724e-06		SEC24D	1.01324	2.29664e-05		KIR2DL1
	TM4SF1	1.31593	0.0496139		TIMM10	1.01266	0.000929462		HLA-DQA1
	TRAFD1	1.31484	4.90619e-05		NMI	1.01145	4.76479e-05		WNT10B
	TAP2	1.31474	9.27066e-05		MAOA	1.01124	0.0504154		CD1E
	MTHFD2	1.31406	3.66717e-05		NT5DC4	1.01073	0.00352275		CACNA2D2
	APOBEC3B	1.31022	1.08487e-08		CES1	1.0098	2.87567e-05		SCD5
	TRIM5	1.30482	1.95796e-05		ABCA1	1.00361	5.63526e-06		HS3ST1
	CLEC5A	1.30463	3.68048e-07		SAMD4A	1.00061	0.0129797		ZCCHC18
	RBM47	1.30459	3.70421e-10		CCDC78	-1.00114	0.00590616		SPON2
	OMG	1.30285	4.92627e-06		GRAMD1C	-1.00289	0.000419079		LRFN2
	DHX58	1.30151	0.000827139		KRT73	-1.00302	0.00289476		BFSP1
	LGALSL	1.29954	9.63763e-10		CTSF	-1.00432	9.99454e-06		KIR3DS1
	GCA	1.29899	1.18335e-07		DLG5	-1.0051	8.33778e-07		PRSS23
	IPMK	1.29829	0.000192957		PLCH2	-1.00609	0.00508007		ERBB2
	IGFBP2	1.29668	0.00088896		CACNA2D3	-1.01356	0.000186298		MMP11
	SAMD4A	1.29602	0.00368005		ARVCF	-1.01459	0.0017663		LDB2
	ALPK1	1.29478	3.0038e-11		MAST1	-1.01723	0.0498274		CNFN
	GLRX	1.2941	1.96743e-05		RPH3A	-1.01753	0.000137397		UNC45B
	MLKL	1.2941	2.47053e-06		GPR153	-1.02176	0.00446601		LGR6
	IGSF6	1.29123	2.20538e-10		C16orf74	-1.0245	1.13444e-05		CD79B
	LILRA5	1.29085	7.55026e-08		FSD1	-1.02532	0.00499367		FGFBP2
	GRINA	1.29055	9.57048e-06		NEIL1	-1.03057	2.08038e-05		SPRY1
	IDI1	1.28942	6.55234e-07		TRIM74	-1.03191	0.0256937		RNF165
	ZC3HAV1	1.28877	5.00495e-06		FAM229B	-1.03213	0.13288		AFF3
	MDK	1.28828	0.000253664		IFNG	-1.03373	0.0693969		KLRC3
	MX2	1.28625	9.86776e-08		PCSK4	-1.03452	0.018778		OSBPL10
	NAMPT	1.28505	3.69292e-07		GNLY	-1.03508	0.00251199		PODN
	IDO2	1.28341	0.0890091		USP43	-1.0384	0.0334568		ARHGEF28
	ZNF684	1.28288	0.000573247		RTKN	-1.04477	0.0113902		DMKN
	ERLIN1	1.28197	6.50695e-05		AKR7A3	-1.04811	0.118636		SH2D1B
	FPR2	1.27997	1.51471e-12		CAPN12	-1.05114	9.20742e-07		NMUR1
	TMEM123	1.278	0.00141039		STK33	-1.05301	0.13722		HLA-DOA
	ODF3B	1.27793	6.00918e-05		ZNF501	-1.05572	0.0383593		FCRL2
	WDFY3	1.27549	9.34508e-10		SLC4A10	-1.05575	0.0245304		SPIB
	TGM2	1.2748	0.00196158		GFPT2	-1.05824	0.0860854		ADAMTS5
	DACH1	1.27365	6.33104e-06		NCAM1	-1.06569	0.00111191		ZNF667
	UBE2D1	1.27248	4.99397e-06		YPEL1	-1.06816	2.14126e-13		PTPRK
	LMTK2	1.27158	1.51475e-09		CD1C	-1.07594	0.000112562		CLEC4F
	ITGA7	1.27152	0.000124382		VIPR2	-1.07596	0.108001		CXCR5
	CR1	1.26799	3.67067e-07		POLR3G	-1.07821	0.119		SLC1A7
	S100A9	1.26635	0.0118675		SYNPO	-1.08209	0.0037086		BOK
	PARP12	1.26039	0.000469347		PALLD	-1.08277	2.73669e-06		KLRC1
	SH2D4B	1.25861	0.00290799		GLB1L2	-1.08714	0.000105206		VIT
	UPP1	1.25592	6.43921e-06		XCL2	-1.08722	2.39814e-05		CR2
	CPEB3	1.2547	0.000174113		GFRA2	-1.08968	0.0146559		SDC2
	DSC2	1.25095	9.96247e-09		COLGALT2	-1.08983	0.00704768		KIR2DL2
	PLAGL1	1.25055	1.66466e-08		LEP	-1.09223	0.0794636		CD72
	CPEB4	1.24985	1.71472e-09		KIR3DL1	-1.0967	0.00257906		KLRF1
	FAM124A	1.24793	0.0425097		PTGDR	-1.0986	5.02267e-05		BEND5
	MT2A	1.24528	0.00111927		SLC5A10	-1.1004	0.0587444		CD200
	ENPP2	1.24404	0.000210486		PAK6	-1.1017	0.00392401		CD79A
	IL1R2	1.24065	0.000406803		SDK2	-1.1068	0.0127845		EDA2R
	MGAM	1.23946	3.83518e-08		GATM	-1.1098	0.010066		LAMA5
	B3GALNT1	1.23815	0.0231194		KIR2DL1	-1.11318	0.00499279		HTR3A
	GPR65	1.23796	7.25566e-06		HLA-DQA1	-1.11325	0.000140867		CD19
	AP5B1	1.23749	3.83006e-10		WNT10B	-1.11666	0.000566941		EBF1
	MCTP1	1.23626	2.72771e-10		NAT8L	-1.11919	0.0518937		BLK
	LILRB5	1.23602	1.36931e-06		CD1E	-1.12329	0.019611		ZBTB7C
	PRRG4	1.2353	3.42492e-06		CACNA2D2	-1.12344	0.00223034		DEGS2
	IRF1	1.23523	5.85812e-06		SCD5	-1.12892	0.000500982		KIR2DS1
	IL1RAP	1.23427	5.31013e-07		HS3ST1	-1.13006	0.028086		MYBPC2
	ATG3	1.23291	7.6714e-07		MYO5C	-1.13448	0.00682605		LCN10
	GJA4	1.23271	0.0504222		ERBB3	-1.13495	0.127722		FCER2
	ZNF438	1.2325	1.69709e-08		ZCCHC18	-1.13648	6.31858e-05		AK8
	MAP2K6	1.23187	1.2325e-07		SPON2	-1.13996	0.00132564		PCDH9
	DNAJA1	1.23043	7.29311e-07		MOXD1	-1.1476	0.123915		SCN4A
	PGAP1	1.23025	0.0078901		LRFN2	-1.14849	0.109663		PGBD5
	WDFY1	1.22812	9.493e-05		ZNF415	-1.15345	0.102893		MS4A1
	PHLDA2	1.22771	0.0520188		ST8SIA6	-1.15647	0.0906462		TNFRSF13C
	TMEM140	1.22691	7.64804e-06		BFSP1	-1.16312	9.54289e-05		DOK7
	TNFAIP3	1.22615	6.76468e-10		SPTSSB	-1.16484	0.0557832		GLI1
	OR52K1	1.22548	0.00134702		KIR3DS1	-1.16617	0.127243		NXPH4
	CAPZA2	1.22539	0.000649384		PRSS23	-1.16764	0.000447317		ARHGAP39
	EVI2A	1.22531	0.024954		CYP11A1	-1.17568	0.114937		CNTNAP2
	NUCB1	1.22391	0.000311027		KCNK10	-1.18081	0.05542		FCRLA
	C1GALT1	1.22306	6.89522e-05		ERBB2	-1.18145	0.000234133		CLEC17A
	SP110	1.22265	3.69686e-06		NPTX1	-1.18554	0.0555782		COL19A1
	FCAR	1.21702	3.71919e-07		MMP11	-1.18585	0.00184405		PRCD
	MMP8	1.2165	0.00219322		LDB2	-1.18674	0.141567		TPBGL
	MYO10	1.21596	0.000327176		CNFN	-1.18705	0.0174693		TCL1A
	P2RY1	1.21547	0.0114883		UNC45B	-1.19288	0.0265256		LINGO2
	ATXN7	1.21448	3.41773e-08		LGR6	-1.19456	0.00368814		PAX5
	SYNC	1.21193	0.0685028		CD79B	-1.19569	1.77415e-06		PEG10
	MAFA	1.21148	0.0580207		IL7	-1.20123	0.116302		ABCB4
	PARP10	1.2114	0.00125492		FGFBP2	-1.21073	0.00524489		MACROD2
	WSB1	1.20988	2.20538e-10		GUCY2D	-1.21286	0.0870173		CD22
	MAK	1.20794	2.80421e-07		KLRC4-KLRK1	-1.21647	0.00400904		CORO2B
	BST2	1.20791	0.000278896		C12orf42	-1.21997	0.00361367		ZNF860
	SERPINB1	1.20742	2.35692e-09		TMEM171	-1.22275	0.016008		NIPAL4
	LACTB	1.20623	6.29872e-08		SPRY1	-1.22921	0.0944877		TCL1B
	EXOC6	1.20559	3.35069e-06		XKRX	-1.23163	0.10939		VPREB3
	RICTOR	1.2051	0.00015076		RNF165	-1.23208	0.00202025		KCNH8
	PFKFB2	1.20285	0.000282698		TMSB15B	-1.23686	0.0363112		FAM177B
	CNIH4	1.2028	8.2191e-07		MYO1B	-1.23689	0.0437844		KCNG1
	CASP4	1.20184	2.26507e-09		AFF3	-1.23941	7.58139e-06
	FCGR3B	1.20171	5.51099e-11		KLRC3	-1.24222	5.55399e-05
	AP3B2	1.20055	0.0282133		OSBPL10	-1.24646	0.000698286
	MAPK14	1.20041	1.10879e-12		PODN	-1.24993	0.0104393
	CDKL5	1.19831	0.00564017		B3GALT2	-1.25826	0.0583289
	IL10	1.19779	0.00141106		ARHGEF28	-1.26385	0.0308771
	RAB39A	1.19674	0.00176585		DMKN	-1.26688	0.0158503
	SMCHD1	1.19214	1.71918e-07		ZBTB16	-1.27661	0.000985907
	TXLNB	1.19144	0.000194955		SH2D1B	-1.27661	6.28339e-05
	ASPRV1	1.19031	7.77309e-07		SCGB3A1	-1.28131	0.0933559
	RALB	1.18914	8.6487e-08		GPR173	-1.28745	0.133419
	SMCO4	1.18878	0.000183864		NMUR1	-1.29713	0.000163656
	NOD2	1.18437	2.10795e-08		MATN2	-1.29746	0.0197679
	CD276	1.18182	0.0300275		HLA-DOA	-1.30474	1.31164e-07
	LYRM1	1.18125	2.72385e-07		FCRL2	-1.31235	3.72781e-05
	C18orf25	1.17653	6.56871e-06		SPIB	-1.31259	1.401e-08
	GADD45B	1.17475	1.24887e-06		ADAMTS5	-1.32593	0.00950347
	NDUFB3	1.17471	0.000114973		ZNF667	-1.32653	0.0434742
	TYMP	1.17382	8.5562e-06		PTPRK	-1.32966	0.00948553
	C1GALT1C1	1.17364	1.898e-06		CLEC4F	-1.33884	0.0130394
	ITLN2	1.17359	0.091015		CXCR5	-1.34739	7.03953e-07
	PRUNE2	1.17175	5.80445e-06		CALML6	-1.35554	0.141631
	DYSF	1.17122	2.80974e-05		ETNK2	-1.36502	6.50281e-05
	USP15	1.17078	1.9859e-06		SLC1A7	-1.36634	0.00116032
	TGFA	1.16993	3.49585e-06		FPGT-TNNI3K	-1.37218	0.126407
	EDNRB	1.16744	0.0928059		BOK	-1.37302	0.00982571
	CXCL9	1.16662	0.0366517		KLRC1	-1.38867	0.00021019
	DRAM1	1.16621	1.47953e-08		VIT	-1.39184	0.0291552
	BTBD19	1.16528	0.000553206		CR2	-1.4021	7.71473e-05
	FNDC3B	1.16452	1.5635e-10		SDC2	-1.40224	0.00355794
	F2RL1	1.16385	2.39356e-10		HAVCR1	-1.40913	0.110932
	CLEC4E	1.1627	1.50589e-06		KIR2DL2	-1.41352	0.00122376
	NTNG2	1.15883	1.77976e-06		CPNE7	-1.44288	0.00257722
	BMP2	1.15874	0.020836		CD72	-1.4432	7.86911e-12
	MAN1A1	1.1587	8.6487e-08		CCSER1	-1.45017	0.0820112
	GTF2H2	1.15843	2.14671e-05		C8G	-1.45684	0.0534489
	ARHGAP29	1.15748	0.0308584		LCNL1	-1.49569	0.0765776
	SP100	1.15437	6.01187e-08		KLRF1	-1.50316	2.28274e-06
	LIN7A	1.15406	1.71491e-07		BEND5	-1.5032	0.00362858
	C1orf226	1.15389	7.16336e-05		CD200	-1.51684	0.00699383
	ZNF117	1.15386	0.000115386		CD79A	-1.52305	6.21895e-06
	ARID4B	1.15305	1.01013e-05		EDA2R	-1.55529	0.011617
	CLIC4	1.1526	3.15959e-15		IRGM	-1.57565	0.0277733
	PSME2	1.15092	0.000481819		LAMA5	-1.58934	0.00097988
	ARG1	1.14893	0.0213836		FGF17	-1.59783	0.0646436
	SLC2A14	1.14863	0.00155035		DCBLD2	-1.60611	0.0841656
	PTGS2	1.14646	7.87041e-05		HTR3A	-1.61664	0.0290716
	KLHL2	1.14609	8.81095e-05		CD19	-1.61802	1.57777e-06
	TENM1	1.14316	0.000676235		EBF1	-1.61937	0.000822655
	COX7B	1.14172	0.0256332		ZNF334	-1.672	0.106544
	PHTF1	1.14103	5.00745e-08		ZMAT4	-1.68809	0.0513808
	SIPA1L2	1.14094	0.000131024		BLK	-1.68965	1.03166e-11
	TEAD3	1.14075	0.0187468		ZBTB7C	-1.70477	0.0468834
	DHRS12	1.13989	5.0198e-06		DEGS2	-1.72479	0.021122
	PLOD2	1.13975	0.00542337		KIR2DS1	-1.72991	0.0114433
	CPEB2	1.1383	1.15453e-05		MYBPC2	-1.7364	0.0197261
	GIMAP2	1.13634	0.000776283		LCN10	-1.74011	7.43017e-05
	MS4A4A	1.13587	4.16224e-05		FCER2	-1.7499	1.50171e-08
	TREM2	1.13483	0.0592983		PIFO	-1.75666	0.0847321
	RNF24	1.13457	7.35817e-10		AK8	-1.76062	0.00219729
	EIF4G3	1.13446	2.45418e-05		PCDH9	-1.76956	0.00109536
	BLZF1	1.13399	1.98404e-06		CCNB3	-1.80909	0.0235312
	TLR4	1.13368	2.98949e-09		SCN4A	-1.80955	0.0407998
	CASP1	1.13367	8.94451e-08		PGBD5	-1.82611	0.0277065
	ABCA1	1.13334	6.60095e-09		MS4A1	-1.82902	1.60748e-08
	CMTM1	1.13189	8.69045e-10		ESM1	-1.83076	0.0177139
	TMEM165	1.13179	4.14242e-07		PCDHGB6	-1.84053	0.119396
	ECE1	1.12711	1.28908e-08		TNFRSF13C	-1.85069	3.13695e-06
	GTF2H2C	1.12696	1.34158e-06		DOK7	-1.8577	0.000177797
	EXPH5	1.126	0.0316988		GLI1	-1.9265	4.11646e-05
	LILRA6	1.12567	1.09088e-07		NXPH4	-1.99382	0.0353757
	TRIM21	1.12454	1.26988e-05		ARHGAP39	-1.99503	0.0584863
	FCER1G	1.12447	5.02484e-08		CNTNAP2	-2.00872	0.0154335
	TMEM92	1.12333	0.000341358		FCRLA	-2.05339	2.03613e-12
	RNF149	1.1224	6.73511e-10		CLEC17A	-2.10616	1.5635e-10
	SPINK8	1.12162	0.0684646		COL19A1	-2.12748	0.00174687
	NT5DC4	1.11976	0.00219173		PRCD	-2.12914	0.0152553
	ZNF200	1.11898	5.32086e-07		TPBGL	-2.17584	0.0236869
	SLC5A9	1.11763	0.000490048		TCL1A	-2.19048	5.33502e-18
	ZNF107	1.1163	3.74725e-05		LINGO2	-2.19343	0.00235271
	POU5F1	1.11555	0.000269756		PAX5	-2.29098	2.21787e-07
	NUB1	1.11432	0.000695832		PEG10	-2.30897	0.00116412
	KIAA0040	1.11425	1.09806e-08		ABCB4	-2.32258	0.000142015
	C2	1.11417	0.000877075		MACROD2	-2.34776	0.000150511
	NFKBIA	1.11158	1.30626e-11		CD22	-2.396	1.03166e-11
	PLAUR	1.10927	3.02771e-09		CORO2B	-2.4632	4.44884e-08
	FANCA	1.10894	0.00331515		ZNF860	-2.47134	0.033049
	RIPK2	1.10893	0.000274127		NIPAL4	-2.68224	0.00391464
	POLB	1.10589	0.000142864		TCL1B	-2.69586	6.15279e-06
	STX3	1.10507	5.95395e-10		VPREB3	-3.14701	4.48387e-18
	DCUN1D3	1.10477	1.33603e-05		KCNH8	-3.51548	2.6214e-06
	SP140	1.10461	0.00380723		FAM177B	-3.58941	2.68239e-06
	ALDH1A2	1.10449	0.00389035		KCNG1	-3.98114	6.34961e-08
	ASPHD2	1.10307	0.000102659
	SULT1B1	1.10244	0.000250534
	MOB1A	1.10213	6.95116e-07
	MSRB2	1.10188	4.50609e-05
	KIF1B	1.09977	7.35817e-10
	FZD5	1.09973	0.000629169
	CD69	1.09963	0.0836628
	HELB	1.09717	2.00429e-05
	IL15RA	1.09704	3.21688e-06
	FCGR2A	1.09583	9.75035e-11
	PSMB9	1.09536	0.000146974
	CDC42EP2	1.09466	1.39065e-05
	FLOT1	1.09435	5.073e-06
	CD2AP	1.09303	0.00225152
	DLC1	1.09166	0.00417457
	CDK17	1.09134	0.000412994
	SELL	1.09093	1.2325e-07
	PDE4B	1.08809	1.33607e-05
	SEMA3B	1.08704	0.000228238
	CLEC1B	1.08619	0.000564156
	ROPN1L	1.08606	0.000116215
	BACH1	1.08604	1.32273e-08
	HDAC4	1.08397	3.17564e-08
	PLIN5	1.08349	8.6539e-06
	ST6GALNAC3	1.08252	0.000927937
	SCML1	1.081	0.0166926
	CD46	1.07947	1.72548e-05
	ALPL	1.07906	0.00357248
	NAIP	1.07863	2.20569e-05
	TRIM56	1.07808	0.00024762
	MAFF	1.07684	0.000547155
	RAB24	1.07595	1.44739e-07
	PAGE2B	1.07191	0.0101637
	TLR8	1.06966	1.5413e-10
	CHD1	1.06938	7.22908e-07
	KPTN	1.06783	0.00060132
	B2M	1.06739	0.000116979
	ANKRD33B	1.06648	4.76078e-06
	PI4K2B	1.06633	0.00807323
	TMTC1	1.06618	3.65744e-05
	CD55	1.06563	7.049e-07
	DEK	1.06548	0.000475057
	TET2	1.06534	7.49495e-08
	PHF11	1.06325	0.000158144
	MIER1	1.06262	0.000222537
	ATP11B	1.06255	2.29571e-06
	PADI2	1.06152	1.38077e-05
	LRG1	1.0607	9.25592e-05
	IFITM2	1.0596	7.31223e-06
	NAB1	1.05824	3.4715e-05
	DMXL2	1.05539	1.30328e-07
	PRDM8	1.05412	1.292e-05
	HNRNPH2	1.05257	6.46917e-08
	C21orf91	1.05215	0.000475332
	HIPK3	1.05201	0.000564326
	MICB	1.05019	1.18078e-05
	PGS1	1.04921	3.52014e-06
	COL9A2	1.0491	0.0006928
	STAC	1.04905	0.0965253
	LILRB3	1.0485	1.82708e-06
	SEC24D	1.04626	3.1639e-07
	UBE2J1	1.04534	2.81741e-09
	STOM	1.04474	4.81385e-06
	KCNMA1	1.0446	0.0446432
	SRGAP2C	1.04439	0.000305738
	MEF2A	1.04427	3.83592e-07
	ATP9A	1.04081	0.00129363
	EMP1	1.04069	3.7702e-05
	C9orf72	1.0404	5.78947e-05
	TICAM2	1.03867	0.00658295
	RNASEL	1.03862	2.24844e-08
	SGIP1	1.03738	0.0808505
	ZNF366	1.03644	0.0133522
	FEM1C	1.03639	6.26849e-05
	TRIM38	1.03514	1.30075e-05
	LONRF1	1.03321	7.77138e-06
	CREBRF	1.03286	0.000243727
	PPP4R2	1.03221	0.000204088
	TESK2	1.03156	2.84283e-06
	IRAK3	1.0308	5.79163e-05
	CKLF	1.02921	2.77346e-05
	PAG1	1.02911	1.49077e-10
	SLC2A3	1.02844	5.50035e-06
	LIG4	1.02814	0.000207263
	PRDM1	1.02807	5.9786e-06
	CPD	1.02805	2.85473e-07
	TNFAIP2	1.02768	3.681e-05
	LNPEP	1.02731	1.43808e-06
	KRT7	1.02562	0.0191408
	SIGLEC14	1.02546	1.59362e-08
	HIF1A	1.02543	2.40235e-09
	ADAR	1.02352	2.18914e-06
	RAB8B	1.023	0.000761767
	SPPL2A	1.02295	7.30388e-07
	PLIN4	1.02263	0.0002602
	GAS7	1.02239	0.000237272
	C3	1.02204	0.0138211
	PLEK	1.02071	1.75432e-06
	SLC44A3	1.0179	0.0354735
	XKR7	1.01746	0.0892377
	CASP7	1.01532	9.8405e-05
	PSMA4	1.01481	0.000810896
	NFIL3	1.01475	4.08563e-09
	TRIM69	1.01407	1.31012e-06
	TOP1	1.01324	8.18957e-06
	TLR2	1.01272	2.72385e-07
	NFKBIZ	1.01245	2.54742e-08
	RUFY4	1.01184	0.000695832
	ATP1B2	1.01144	0.0533621
	CMTM6	1.01103	9.33704e-05
	ZNFX1	1.01044	0.000147607
	MYBPC3	1.0097	7.049e-07
	RBCK1	1.00964	0.00127863
	MSRB1	1.00957	1.30543e-06
	MEFV	1.0083	9.7627e-08
	PLAC8	1.00815	2.79747e-05
	STEAP4	1.00815	3.79739e-07
	RNF138	1.00746	0.00231182
	LYSMD2	1.00718	0.00187384
	LYN	1.00701	2.85262e-11
	HSPA6	1.00641	1.26255e-07
	SERPINB2	1.00612	0.000548067
	MXD1	1.00442	1.57885e-09
	SRPK1	1.00398	1.80178e-08
	SBNO2	1.00382	0.00010825
	SEMA6B	1.00298	0.0209173
	PSMB8	1.00285	3.99311e-05
	FNDC3A	1.00271	4.92183e-07
	GPR141	1.00261	1.36514e-06
	BRCA2	1.00225	0.0290016
	ZFYVE16	1.00199	0.0001205
	SIGLEC5	1.0013	2.57439e-06
	TMEM255A	1.00067	0.0453389
	B4GALT5	1.00037	1.11533e-07
	KCNC3	-1.00007	1.10373e-05
	ZNF285	-1.00135	0.0333313
	PACSIN1	-1.00444	9.56113e-05
	LGALS9B	-1.00451	0.00140645
	PHLDA3	-1.00466	0.000255736
	ZBED3	-1.00738	0.080219
	DMRTC1	-1.00754	0.00932247
	ASIC1	-1.00867	0.011816
	PROC	-1.00905	0.00807695
	CELSR2	-1.01009	0.00336675
	PC	-1.01026	9.71562e-05
	NAV1	-1.01442	6.73703e-05
	C1orf21	-1.01599	7.18806e-06
	SLC5A5	-1.01745	0.00209414
	HAGHL	-1.01861	4.18494e-07
	TSEN54	-1.02042	9.40656e-11
	AEBP1	-1.02066	0.000199975
	HTR7	-1.02247	0.0421351
	NSG1	-1.02412	3.6452e-06
	CCDC78	-1.02706	0.00138923
	PODXL2	-1.02732	6.9343e-06
	PNOC	-1.02981	6.14153e-06
	NCAM1	-1.03109	0.000985083
	XPNPEP2	-1.03323	6.26358e-05
	KLRC3	-1.03325	0.000183093
	SPIRE2	-1.03482	0.048475
	TSPAN13	-1.03563	0.00534938
	CXCR3	-1.03711	4.56613e-05
	KLKB1	-1.03851	3.97731e-05
	SCD5	-1.03916	0.00091053
	PKIG	-1.03917	7.80369e-05
	BNC2	-1.03946	0.00110202
	SRGAP3	-1.04243	5.92381e-05
	CATSPERB	-1.04607	0.0952447
	CACNA1F	-1.05094	0.000848825
	SOX13	-1.05198	3.03818e-06
	TCTN2	-1.05334	7.80111e-05
	HLA-DOB	-1.05529	0.00167133
	CATSPER2	-1.05536	0.00121379
	DLG5	-1.05854	1.15438e-06
	PAK6	-1.06271	0.00272825
	MYOM2	-1.06307	2.03205e-05
	ACTL10	-1.06573	0.000173266
	MXRA8	-1.06608	0.0844242
	COCH	-1.06741	0.00188459
	MICAL3	-1.06811	1.46703e-07
	KIR3DX1	-1.07068	0.0165557
	WNT10B	-1.07209	3.37545e-06
	ANGPTL6	-1.07235	0.000117442
	AVPR2	-1.07386	0.0771076
	KLRK1	-1.07446	1.02663e-07
	PDXP	-1.0762	0.0072995
	IL34	-1.07626	0.00411541
	E2F5	-1.07638	0.000324584
	POU2AF1	-1.07819	0.000119694
	KIAA1671	-1.07857	3.75664e-05
	TLE1	-1.07879	3.76741e-07
	KIR2DL1	-1.07938	0.00666888
	NACAD	-1.08135	0.0709971
	GPRC5B	-1.08195	0.0151683
	SEMA4G	-1.0835	0.0335297
	A2M	-1.08396	0.0125345
	TSPYL5	-1.08462	0.00336426
	GATM	-1.08563	0.00620889
	TEF	-1.09042	1.10201e-06
	C11orf80	-1.09081	3.23632e-06
	ZFR2	-1.09282	0.012617
	IL5RA	-1.09291	0.00211131
	TKTL1	-1.09434	1.19478e-07
	GFPT2	-1.09449	0.0582776
	ZNF418	-1.09512	1.79145e-07
	PNMA3	-1.0975	4.25379e-07
	FCRL3	-1.09776	5.8907e-07
	OVGP1	-1.09987	6.45458e-06
	HES1	-1.10048	0.000135322
	C16orf74	-1.10314	8.07897e-07
	WNT7A	-1.10361	0.0109991
	NTN5	-1.1039	0.00508848
	CLEC10A	-1.10423	6.31663e-06
	TRIM45	-1.1043	0.0500741
	FCRL6	-1.10465	4.50609e-05
	GPR20	-1.10549	0.0434269
	THBS4	-1.10632	0.00253821
	MMP28	-1.10671	0.0434537
	ENG	-1.10774	9.7346e-06
	COL5A3	-1.10797	0.00281605
	CERCAM	-1.10895	6.98452e-05
	GNB3	-1.11042	0.0603235
	ZNF667	-1.1122	0.0180691
	PIK3C2B	-1.11246	1.51282e-07
	EFHD1	-1.11322	0.00392966
	DBP	-1.11391	1.82124e-09
	JAKMIP2	-1.11447	3.28849e-05
	STAG3	-1.11681	7.16224e-05
	ELOVL4	-1.11741	0.0121994
	ZCCHC18	-1.11757	0.000300311
	SLC16A11	-1.11951	0.0315138
	MACROD1	-1.12012	0.00026837
	ACER1	-1.12095	0.0819902
	LYNX1	-1.12164	4.90274e-05
	SORBS3	-1.12186	3.09692e-06
	CD34	-1.12309	0.0134919
	BANK1	-1.12373	0.000242305
	STARD9	-1.12494	5.78749e-10
	SPON2	-1.12549	2.80771e-05
	HLA-DQA1	-1.12663	1.48642e-08
	TARP	-1.12729	2.97091e-07
	GSTA4	-1.12806	0.0127866
	DTX1	-1.12851	1.69996e-05
	CXXC5	-1.13921	1.43557e-09
	ADAM12	-1.13922	0.0218166
	PROX2	-1.1396	0.0357878
	ADAMTS10	-1.14086	1.22867e-10
	CCDC122	-1.14121	0.0579372
	NRG1	-1.14162	0.00311255
	ARVCF	-1.14419	6.38238e-07
	CTSF	-1.14476	1.33827e-07
	KISS1R	-1.14646	0.0298766
	B3GAT1	-1.14716	4.35119e-05
	KLRD1	-1.14725	3.14171e-06
	SNED1	-1.14892	0.000320461
	CLDND2	-1.15227	5.85812e-06
	KLRC1	-1.15385	0.0130296
	SLC29A2	-1.16355	9.49561e-07
	CYP2S1	-1.16373	5.94611e-05
	OBSL1	-1.16463	0.0068883
	SCARA5	-1.16527	0.00739745
	AGAP1	-1.16566	5.31499e-06
	TPPP3	-1.17241	1.31494e-06
	L1CAM	-1.17266	0.00010154
	STRC	-1.17286	0.00950247
	KIR2DS2	-1.17475	0.00189941
	CAPN14	-1.17701	0.0310036
	RGS9	-1.17877	2.01497e-05
	TMPRSS5	-1.18024	0.0119365
	ATOH8	-1.18611	2.31321e-06
	IGFBP4	-1.18843	0.000102659
	ZNF853	-1.18932	6.0729e-07
	ULBP3	-1.19279	0.0633482
	SSC5D	-1.1972	0.0740099
	CD160	-1.19761	8.73334e-06
	PTGFRN	-1.19853	0.000406837
	CKB	-1.20009	1.10302e-05
	ISM1	-1.20154	0.0202114
	PDGFD	-1.20167	0.000143838
	PDE8B	-1.20287	0.0245202
	S1PR5	-1.20458	2.48231e-06
	KIR3DS1	-1.20582	6.2701e-05
	VPS37D	-1.20926	0.074265
	SLC4A3	-1.20945	0.00785303
	PDZD4	-1.21255	3.79739e-07
	LAMA2	-1.21403	0.0010012
	PTGDR	-1.21631	4.05181e-06
	CPAMD8	-1.21633	6.05661e-06
	LGALS2	-1.21745	8.10368e-05
	DMKN	-1.21838	0.029178
	MATK	-1.21849	4.33584e-11
	PTGDR2	-1.22041	0.000367276
	CCR6	-1.22274	1.18997e-05
	COL6A2	-1.22644	9.40943e-07
	OLIG2	-1.22747	0.00981339
	SLC16A14	-1.22829	0.0331135
	SLC4A10	-1.22891	0.0305204
	RNF165	-1.23235	4.03849e-05
	FCGBP	-1.23401	2.79976e-06
	ENHO	-1.23442	0.00350366
	ATP13A4	-1.23472	0.0161552
	AKR7L	-1.23582	0.0291026
	CNR2	-1.23666	2.05076e-05
	PNPLA7	-1.23725	4.90796e-06
	P2RX5-TAX1BP3	-1.23756	1.3957e-05
	SYNGR3	-1.23843	0.000962497
	SGSM1	-1.23894	0.000121108
	PDE7B	-1.24031	0.00071999
	TPBGL	-1.2408	0.0941876
	ACE	-1.2429	8.34968e-05
	ERBB2	-1.24337	6.12751e-09
	ZNF683	-1.25184	9.16191e-06
	HIP1R	-1.25987	5.88193e-13
	P2RX5	-1.26262	1.19523e-07
	RNFT2	-1.26301	0.0244372
	OLFM1	-1.26321	0.000193998
	APCDD1	-1.26403	0.00291202
	PLCH2	-1.26643	3.67479e-08
	TSPAN10	-1.26782	0.0722516
	GRAPL	-1.27104	0.000956535
	CDHR3	-1.27902	0.000385989
	GIPR	-1.2792	9.8245e-06
	CACNA2D2	-1.28255	0.000135921
	LGALS4	-1.28261	2.05076e-05
	RDH16	-1.28463	0.000167949
	LRFN2	-1.286	0.089036
	FBLN2	-1.28732	3.72514e-05
	ACY3	-1.28855	0.00272351
	COLGALT2	-1.28857	1.51134e-06
	LTK	-1.28996	7.29311e-07
	FPR3	-1.29101	0.000769941
	FAM187A	-1.29245	0.017799
	SGCA	-1.29427	0.0277395
	ZNF229	-1.29473	0.00641253
	BHLHE41	-1.29811	0.00372833
	N4BP3	-1.30125	0.000590254
	KLRF1	-1.30303	0.000335791
	GNG3	-1.30352	0.030591
	FXYD7	-1.3112	1.85099e-05
	DIRAS1	-1.31124	0.000966134
	MMP11	-1.3114	5.56187e-05
	CARNS1	-1.31176	2.24556e-08
	FCRL5	-1.31242	5.83823e-06
	ADAMTS5	-1.31244	0.0110279
	EPHB3	-1.31246	0.000606646
	CHAD	-1.3161	0.00182062
	ARHGEF28	-1.32141	0.00899439
	PID1	-1.32192	0.000112768
	GPR82	-1.32641	0.00352319
	COLEC12	-1.32679	0.0147323
	CABP4	-1.32846	3.09109e-05
	SDS	-1.32945	0.00241692
	SH2D1B	-1.33031	1.17401e-06
	PMEPA1	-1.33221	3.67837e-07
	CLIC3	-1.33265	8.3499e-08
	KLHL14	-1.33641	0.000223155
	C16orf96	-1.33648	0.0500964
	BCL7A	-1.34163	2.98949e-09
	SYNPO	-1.34935	0.000228409
	BEND5	-1.34944	6.13718e-05
	GRM2	-1.35027	0.000242654
	KIR3DL2	-1.35651	1.53365e-05
	NT5E	-1.35792	3.78768e-07
	TLE6	-1.3596	0.0320671
	MROH7	-1.36092	0.0109614
	SLC45A1	-1.36331	0.000460691
	BFSP1	-1.3635	4.82401e-07
	NCR3	-1.36486	5.97748e-11
	NUAK1	-1.36582	0.0013904
	KCNIP2	-1.36645	3.74079e-08
	TMEM132E	-1.3681	0.0539878
	TPBG	-1.37159	0.0400006
	MSLN	-1.37243	0.0458358
	AKAP5	-1.37419	0.0348781
	SLC5A2	-1.37707	0.0120035
	SNX22	-1.37925	9.65868e-05
	GNLY	-1.37929	7.35817e-10
	GPR153	-1.38533	1.99167e-08
	IGFBP6	-1.39177	0.00424181
	PLA2G2D	-1.39235	0.00405226
	BOK	-1.39828	0.0048219
	SPNS3	-1.39981	2.34747e-07
	PALD1	-1.40513	1.84211e-05
	EPHX4	-1.40912	0.0266778
	PRSS57	-1.41102	5.59727e-05
	BEND4	-1.41709	0.00926461
	KIR2DL2	-1.42132	9.85889e-05
	ALOX15	-1.4254	0.0119365
	SIGLEC8	-1.42632	0.0117736
	DNASE1L3	-1.42732	0.000493095
	DENND5B	-1.43067	6.31663e-06
	C1orf127	-1.43178	0.000432297
	KIR2DL3	-1.4318	8.92389e-06
	HSD17B14	-1.43891	0.0895376
	GLI1	-1.43929	9.03352e-05
	ACTN3	-1.4405	0.0829073
	SFRP5	-1.44534	0.0150306
	TXNRD3	-1.44715	0.000157752
	HRK	-1.44804	0.0729783
	PRSS33	-1.44892	0.00631791
	ULBP2	-1.45264	0.0504468
	PRSS23	-1.45285	7.56973e-08
	SCN3A	-1.45652	0.0970224
	ABCA6	-1.45795	0.0288287
	AXL	-1.45803	0.00957084
	SCT	-1.46389	0.0377095
	VIT	-1.47769	0.0103773
	KIR3DL1	-1.48502	1.25335e-05
	OR13A1	-1.49012	0.0183457
	CALY	-1.4941	0.0798318
	KCNK17	-1.49478	0.000783744
	CD1C	-1.49576	2.81049e-08
	KCP	-1.49743	0.0808216
	MMP23B	-1.50253	0.000834719
	PROM2	-1.50504	0.00776158
	FGFBP2	-1.50716	9.24576e-08
	KIF19	-1.50794	3.32407e-05
	ITGB4	-1.5099	0.00190052
	SLCO2B1	-1.51217	0.10002
	B3GNT7	-1.51923	1.62137e-07
	FSCN2	-1.51992	0.00950074
	NMUR1	-1.52006	5.95813e-09
	ZDHHC1	-1.5236	1.72012e-06
	CRIP3	-1.52522	5.61911e-06
	FXYD1	-1.52783	0.00283529
	CELSR1	-1.52849	5.1606e-07
	PRCD	-1.52911	0.0162936
	SDC2	-1.53438	2.3741e-05
	EDN3	-1.53517	0.00123019
	SPRY1	-1.53603	0.00263685
	PODN	-1.5409	0.000190599
	CYP2E1	-1.55297	7.42245e-05
	DEPTOR	-1.55619	0.00452442
	DSCAML1	-1.55731	0.0500741
	HOXC5	-1.56285	0.00844065
	BAALC	-1.57018	0.00779227
	AK8	-1.57821	0.000549961
	DBNDD1	-1.57932	1.90146e-06
	SDK2	-1.59262	1.75432e-06
	HOXB9	-1.6022	0.0358736
	SLC5A10	-1.60335	0.00290141
	COL19A1	-1.61068	0.00100876
	COBLL1	-1.61557	1.8042e-05
	LINGO2	-1.61641	0.0331135
	IFNL1	-1.62075	0.00736116
	CNFN	-1.62251	0.000365856
	PLEKHD1	-1.63292	0.0293291
	GLB1L2	-1.64019	3.16192e-08
	ZNF860	-1.65925	0.0109975
	CD79B	-1.67018	1.55344e-11
	SNX32	-1.6755	0.00562797
	LGR6	-1.67598	3.48863e-08
	HLA-DOA	-1.67723	6.64533e-13
	VIPR2	-1.67855	4.15784e-05
	SPIB	-1.68167	3.92793e-09
	LRRC17	-1.6829	0.0468025
	RSPO4	-1.68585	0.0196283
	LIM2	-1.69175	0.000608104
	PCDH9	-1.69807	0.00149752
	DOC2A	-1.7032	0.0242737
	PCDHGC3	-1.72084	0.0137231
	KIR2DS1	-1.72768	9.98237e-05
	GFRA2	-1.72818	3.1639e-07
	FCRL2	-1.73395	8.17021e-09
	LYPD2	-1.73577	1.80991e-05
	DEGS2	-1.74183	0.00111203
	ARHGAP39	-1.7442	0.011273
	COL5A1	-1.74685	0.0198607
	RPH3A	-1.7633	1.48802e-08
	CD72	-1.76352	1.57949e-08
	SGCE	-1.76636	0.0225845
	UGT8	-1.77106	0.0198899
	PLD4	-1.7715	3.22305e-08
	VMO1	-1.78104	2.47647e-08
	HS3ST1	-1.7884	9.7346e-06
	GFAP	-1.7931	0.0693165
	SLC1A7	-1.80429	4.38581e-08
	EDA2R	-1.80997	0.00959627
	FAM167A	-1.8181	1.26901e-07
	OSBPL10	-1.82987	1.57949e-08
	CR2	-1.83367	1.1518e-09
	UNC45B	-1.8468	9.44035e-05
	FKBP10	-1.86566	0.0551086
	LDB2	-1.87829	0.00301155
	MS4A1	-1.88761	2.85473e-07
	SMOC1	-1.89267	0.0274427
	ADORA1	-1.90673	0.00316675
	RTKN	-1.91313	2.80771e-05
	CXCR5	-1.91721	3.1994e-12
	ZBTB7C	-1.97483	0.00376479
	SLC34A1	-1.98502	0.0548434
	LRRC43	-1.9919	0.000559247
	PEG10	-1.9922	0.000142321
	AFF3	-2.00599	4.25104e-13
	CD1E	-2.02823	1.33841e-05
	BLK	-2.05344	2.68383e-15
	CLEC4F	-2.09029	9.84646e-07
	DOK7	-2.10591	7.81103e-06
	CD79A	-2.12398	3.18779e-12
	CC2D2A	-2.14868	1.11809e-05
	DGKK	-2.17083	0.0596378
	HTR3A	-2.18469	0.00176553
	CD200	-2.19601	1.45924e-08
	SGCD	-2.22359	0.0162459
	LAMA5	-2.22606	2.78859e-10
	FCER2	-2.2298	1.28427e-10
	PGBD5	-2.23399	0.000766428
	CD19	-2.24813	8.45738e-15
	FCRLA	-2.25511	4.25104e-13
	TNFRSF13C	-2.26829	3.64488e-09
	PTPRK	-2.28165	5.60284e-05
	CD207	-2.3071	0.000648429
	LCN10	-2.33344	6.15242e-10
	MACROD2	-2.38056	8.67546e-05
	EBF1	-2.40489	1.48221e-06
	CTTNBP2	-2.41252	0.0148634
	NXPH4	-2.4226	0.0001482
	AJAP1	-2.42366	0.00151408
	PAX5	-2.46751	3.07822e-11
	LCN8	-2.48121	0.037304
	MYBPC2	-2.5097	0.000210517
	CD22	-2.54019	1.95117e-16
	TEAD2	-2.58905	0.000122354
	NIPAL4	-2.62051	9.84847e-05
	TCL1A	-2.63265	1.64026e-15
	LGI4	-2.66509	0.00108157
	CLEC17A	-2.75789	3.47442e-13
	FAM177B	-2.76605	3.44467e-07
	KCNH8	-2.84438	4.98099e-07
	PPAN-P2RY11	-2.95073	0.0183071
	DSP	-2.95314	3.4715e-05
	RAPGEF5	-2.95719	0.000622323
	CNTNAP2	-3.06045	2.38438e-06
	SLC38A11	-3.10477	0.00345076
	TCL1B	-3.20524	1.35899e-09
	KCNG1	-3.37739	8.69045e-10
	CORO2B	-3.42573	1.86948e-08
	ABCB4	-3.47171	1.94338e-08
	SCN4A	-3.71093	3.92502e-07
	VPREB3	-3.75201	6.58287e-19
	MAGED4B	-5.16062	0.00916634
	UBE2F-SCLY	-6.88169	0.0817946

## Sheet: Enriched GO
	Enriched GO terms from common DEG in 600 µg/kg and 900 µg/kg
	Term	Genes	log10p
	cytokine-mediated signaling pathway (GO:0019221)	IFITM3;IFITM1;IL1RN;IL27;IFI35;IFIT1;IFIT3;ICAM1;IFIT2;LMNB1;OASL;TNFSF13B;MT2A;TRIM5;TRIM25;JAK2;TRIM22;SERPINB2;RSAD2;CEACAM1;AIM2;OAS1;OAS2;IL1B;OAS3;IRF7;FOXC1;EBI3;IFI6;CSF2RB;SOCS3;SOCS1;IRAK2;CCL2;GBP2;FCGR1A;GBP1;MAP2K6;CCR1;STAT1;STAT2;MX2;MX1;IL31RA;OSM;ISG15;PML;ISG20;CXCL10;CXCL11;BCL6;FAS;XAF1	26.0642
	cellular response to type I interferon (GO:0071357)	IFITM3;IFITM1;RSAD2;STAT1;MX2;STAT2;MX1;IFI6;ISG15;IFI35;IFIT1;IFIT3;IFIT2;OASL;ISG20;OAS1;OAS2;OAS3;IRF7;GBP2;XAF1	22.9492
	type I interferon signaling pathway (GO:0060337)	IFITM3;IFITM1;RSAD2;STAT1;MX2;STAT2;MX1;IFI6;ISG15;IFI35;IFIT1;IFIT3;IFIT2;OASL;ISG20;OAS1;OAS2;OAS3;IRF7;GBP2;XAF1	22.9492
	negative regulation of viral life cycle (GO:1903901)	IFITM3;IFITM1;RSAD2;MX1;IFIT5;EIF2AK2;ISG15;ZC3HAV1;IFIT1;PML;OASL;ISG20;TRIM6;PLSCR1;OAS1;SLPI;IFI16;TRIM5;OAS2;OAS3	22.0247
	negative regulation of viral genome replication (GO:0045071)	IFITM3;IFITM1;RSAD2;MX1;IFIT5;EIF2AK2;ISG15;ZC3HAV1;IFIT1;OASL;ISG20;TRIM6;PLSCR1;OAS1;SLPI;IFI16;OAS2;OAS3	20.726
	regulation of viral genome replication (GO:0045069)	IFITM3;IFITM1;RSAD2;MX1;IFIT5;EIF2AK2;ISG15;ZC3HAV1;IFIT1;OASL;ISG20;TRIM6;PLSCR1;OAS1;SLPI;IFI16;OAS2;OAS3	18.6381
	interferon-gamma-mediated signaling pathway (GO:0060333)	STAT1;PML;ICAM1;OASL;MT2A;OAS1;TRIM5;OAS2;OAS3;IRF7;TRIM25;JAK2;GBP2;FCGR1A;GBP1;TRIM22	14.9213
	cellular response to interferon-gamma (GO:0071346)	GBP6;STAT1;PML;ICAM1;OASL;MT2A;OAS1;TRIM5;OAS2;OAS3;IRF7;TRIM25;CCL2;JAK2;GBP2;FCGR1A;GBP1;TRIM22	13.5814
	response to cytokine (GO:0034097)	IFITM3;CD274;IFITM1;GCH1;STAT1;MX2;MX1;TRAFD1;EIF2AK2;ISG15;PML;PLSCR1;IRAK2;LAMP3;ALDH1A2;XAF1;JAK2	11.18
	regulation of innate immune response (GO:0045088)	GBP5;PLSCR1;IFI16;STAT1;STAT2;DHX58;TNFAIP3;TRAFD1;PARP9;USP18	7.49646
	regulation of defense response to virus by host (GO:0050691)	TRIM6;AIM2;DTX3L;STAT1;TNFAIP3;IFIT1;PARP9	6.89539
	response to interferon-beta (GO:0035456)	IFITM3;IFITM1;PLSCR1;TRIM6;STAT1;XAF1	6.84439
	regulation of type I interferon production (GO:0032479)	HERC5;IFIH1;ZBP1;IFI16;DHX58;IRF7;TNFAIP3;TRIM25;UBE2L6;ISG15	6.6158
	cellular response to cytokine stimulus (GO:0071345)	GBP6;CCR1;IL1RN;FOXC1;STAT1;STAT2;IL31RA;OSM;CSF2RB;IFIT1;ICAM1;SOCS3;CXCL10;MT2A;SFRP1;TRIM6;SOCS1;BCL6;IRAK2;IL1B;CCL2;JAK2	6.46591
	regulation of interferon-gamma-mediated signaling pathway (GO:0060334)	SOCS3;SOCS1;STAT1;PARP14;PARP9;JAK2	6.42001
	STAT cascade (GO:0097696)	STAT1;STAT2;IL31RA;CCL2;NMI;JAK2	6.42001
	regulation of nuclease activity (GO:0032069)	OAS1;OAS2;OAS3;OASL	6.30227
	positive regulation of innate immune response (GO:0045089)	ZBP1;GBP5;TRIM6;PLSCR1;DHX58;DDX60;TLR5	6.14357
	regulation of response to interferon-gamma (GO:0060330)	SOCS3;SOCS1;STAT1;PARP9;JAK2	6.08255
	negative regulation of type I interferon production (GO:0032480)	IFIH1;HERC5;DHX58;TNFAIP3;TRIM25;UBE2L6;ISG15	5.69156
	response to interferon-alpha (GO:0035455)	IFITM3;IFITM1;MX2;LAMP3;EIF2AK2	5.60705
	negative regulation of cytokine production (GO:0001818)	HERC5;IFIH1;CD274;CEACAM1;DHX58;TRIM25;TNFAIP3;UBE2L6;ISG15;PDCD1LG2	5.56998
	negative regulation of innate immune response (GO:0045824)	IFI16;DHX58;TNFAIP3;TRAFD1;SERPING1	5.22273
	positive regulation of defense response to virus by host (GO:0002230)	TRIM6;AIM2;DTX3L;STAT1;PARP9	5.10949
	response to molecule of bacterial origin (GO:0002237)	CXCL10;CXCL11;TRIM6;SLPI;GCH1;TNFAIP3;FAS;LRRC70;JAK2	5.10446
	regulation of defense response (GO:0031347)	HERC5;CASP5;BCL6;DHX58;TNFAIP3;JAK2;PIK3AP1;USP18	5.07978
	response to lipopolysaccharide (GO:0032496)	CD274;CXCL10;CXCL11;TRIM6;SLPI;GCH1;TNFAIP3;CCL2;FAS;PDCD1LG2;JAK2	5.01964
	interleukin-27-mediated signaling pathway (GO:0070106)	STAT1;EBI3;IL27;JAK2	4.98329
	JAK-STAT cascade (GO:0007259)	STAT1;STAT2;IL31RA;CCL2;NMI;JAK2	4.7982
	apoptotic process (GO:0006915)	CSRNP1;MX1;KREMEN1;IFIT2;STK3;PLSCR1;FAP;CASP5;IL1B;FAS;JAK2;PHLDA2;BCL2L14	4.73187
	regulation of tyrosine phosphorylation of STAT protein (GO:0042509)	SOCS3;SOCS1;OSM;IL31RA;JAK2;PARP9;PARP14	4.72108
	regulation of cytokine-mediated signaling pathway (GO:0001959)	SOCS3;SOCS1;IRAK2;STAT1;STAT2;TNFAIP3;JAK2;USP18	4.49407
	positive regulation of acute inflammatory response (GO:0002675)	IL1B;OSM;FFAR3;FFAR2	4.3854
	positive regulation of cytokine production (GO:0001819)	ZBP1;GBP5;IFI16;IL1B;CLEC6A;DHX58;IRF7;EIF2AK2;FFAR3;FFAR2;TLR5;DDX60	4.27875
	blood circulation (GO:0008015)	CXCL10;STAT1;MYOF;C3AR1;SERPING1;ADM	4.23079
	positive regulation of tyrosine phosphorylation of STAT protein (GO:0042531)	SOCS3;OSM;IL31RA;JAK2;PARP9;PARP14	4.08586
	response to type I interferon (GO:0034340)	MX1;ISG15;IFIT1	4.07294
	acute-phase response (GO:0006953)	IL1RN;PLSCR1;IL1B;APOL2	4.04883
	regulation of response to external stimulus (GO:0032101)	HERC5;BCL6;CASP5;TRIM5;TNFAIP3;JAK2;PIK3AP1;USP18	3.95687
	regulation of cytokine production (GO:0001817)	ZBP1;IFIH1;IFI16;IRF7;EIF2AK2;ISG15;IGF2BP3;CD276	3.92853
	regulation of anatomical structure morphogenesis (GO:0022603)	CEACAM1;SFRP1;BCL6;LRRK2;STAT2;TNFAIP3;KIAA1958	3.88657
	negative regulation of binding (GO:0051100)	SLPI;IFI16;LRRK2;IFIT1;JAK2;DISC1;IFIT2	3.88657
	interleukin-1 beta secretion (GO:0050702)	ABCA1;GBP5;AIM2	3.87323
	regulation of extrinsic apoptotic signaling pathway via death domain receptors (GO:1902041)	SFRP1;TNFSF10;TNFAIP3;FAS;ICAM1	3.74496
	regulation of type I interferon-mediated signaling pathway (GO:0060338)	ZBP1;TRIM6;STAT1;STAT2;USP18	3.74496
	positive regulation of T cell proliferation (GO:0042102)	CD274;IL1B;IGFBP2;EBI3;PDCD1LG2;CD276	3.74186
	positive regulation of type I interferon production (GO:0032481)	IFIH1;ZBP1;IFI16;STAT1;DHX58;IRF7	3.7026
	negative regulation of tyrosine phosphorylation of STAT protein (GO:0042532)	SOCS3;SOCS1;PARP14	3.70154
	interleukin-1 beta production (GO:0032611)	ABCA1;GBP5;AIM2	3.70154
	interleukin-1 secretion (GO:0050701)	ABCA1;GBP5;AIM2	3.70154
	positive regulation of JAK-STAT cascade (GO:0046427)	SOCS3;OSM;IL31RA;JAK2;PARP9;PARP14	3.62626
	vesicle fusion (GO:0006906)	SAMD9L;RAB20;SAMD9;RAB39A;TAP1;VAMP5;STX11	3.51666
	response to interferon-gamma (GO:0034341)	IFITM3;GBP6;IFITM1;GCH1;STAT1;CCL2	3.48168
	positive regulation of intracellular signal transduction (GO:1902533)	IFIT5;OSM;EIF2AK2;SECTM1;DDX60;CXCL10;CXCL11;TRIM5;CLEC6A;DHX58;TNFSF10;TRIM25;FAS;TNFAIP8L3;JAK2;PIK3AP1;TRIM22	3.47315
	mononuclear cell differentiation (GO:1903131)	IFI16;IL31RA;MT1G	3.41714
	activation of cysteine-type endopeptidase activity involved in apoptotic signaling pathway (GO:0097296)	TNFSF10;FAS;JAK2	3.41714
	monocyte differentiation (GO:0030224)	IFI16;IL31RA;MT1G	3.41714
	interleukin-35-mediated signaling pathway (GO:0070757)	STAT1;EBI3;JAK2	3.41714
	positive regulation of interferon-gamma biosynthetic process (GO:0045078)	EBI3;IL27;CD276	3.41714
	regulation of viral entry into host cell (GO:0046596)	IFITM3;IFITM1;TRIM5;TRIM25	3.39722
	regulation of lipid metabolic process (GO:0019216)	HELZ2;ABCA1;LACTB;ACSL1;IL1B;G0S2;TNFAIP8L3	3.35252
	negative regulation of peptidyl-tyrosine phosphorylation (GO:0050732)	SOCS3;SFRP1;SOCS1;PARP14	3.33224
	regulation of hormone secretion (GO:0046883)	OSM;FFAR3;FFAR2	3.29659
	regulation of I-kappaB kinase/NF-kappaB signaling (GO:0043122)	TRIM5;STAT1;IL1B;CLEC6A;IFIT5;TNFSF10;TRIM25;SECTM1;TNFAIP3;TRIM22	3.28795
	positive regulation of extrinsic apoptotic signaling pathway (GO:2001238)	SFRP1;TNFSF10;G0S2;PML	3.26995
	negative regulation of extrinsic apoptotic signaling pathway (GO:2001237)	IL1B;TNFSF10;IFI6;TNFAIP3;FAS;ICAM1	3.22065
	regulation of cAMP metabolic process (GO:0030814)	CXCL10;CXCL11;ADM	3.18704
	chemokine-mediated signaling pathway (GO:0070098)	CCR1;CXCL10;FOXC1;CXCL11;CCL2	3.15305
	negative regulation of extrinsic apoptotic signaling pathway via death domain receptors (GO:1902042)	TNFSF10;TNFAIP3;FAS;ICAM1	3.09729
	positive regulation of purine nucleotide metabolic process (GO:1900544)	CXCL10;CXCL11;ADM	3.0867
	interleukin-6-mediated signaling pathway (GO:0070102)	SOCS3;STAT1;JAK2	3.0867
	regulation of interferon-gamma biosynthetic process (GO:0045072)	EBI3;IL27;CD276	3.0867
	regulation of protein binding (GO:0043393)	SLPI;DTX3L;LRRK2;IFIT1;DISC1;IFIT2;STK3	3.08087
	positive regulation of immune response (GO:0050778)	GBP5;PLSCR1;FFAR3;FFAR2;CD177	3.07744
	negative regulation of endopeptidase activity (GO:0010951)	SERPINB10;SERPINB2;SPINK8;IFI16;SERPING1;ANXA8	3.01791
	positive regulation of cytokine production involved in immune response (GO:0002720)	TRIM6;FFAR3;FFAR2	2.99418
	negative regulation of viral entry into host cell (GO:0046597)	IFITM3;IFITM1;TRIM5	2.99418
	positive regulation of cysteine-type endopeptidase activity involved in apoptotic signaling pathway (GO:2001269)	TNFSF10;FAS;JAK2	2.99418
	regulation of peptide secretion (GO:0002791)	RHBDF2;FFAR3;FFAR2	2.99418
	positive regulation of cytokine-mediated signaling pathway (GO:0001961)	ZBP1;TRIM6;PARP14;PARP9	2.99247
	positive regulation of chemokine production (GO:0032722)	IL1B;FFAR3;EIF2AK2;FFAR2	2.94275
	positive regulation of cyclic nucleotide metabolic process (GO:0030801)	CXCL10;CXCL11;ADM	2.90839
	regulation of interferon-alpha production (GO:0032647)	IFIH1;STAT1;IRF7	2.90839
	cellular response to lipopolysaccharide (GO:0071222)	CD274;CXCL10;IL1B;TNFAIP3;CCL2;PDCD1LG2	2.81021
	regulation of T cell proliferation (GO:0042129)	CD274;IL1B;IL27;PDCD1LG2;CD276	2.8049
	regulation of chemokine production (GO:0032642)	EIF2AK2;FFAR3;FFAR2	2.75364
	positive regulation of I-kappaB kinase/NF-kappaB signaling (GO:0043123)	TRIM5;CLEC6A;IL1B;IFIT5;TNFSF10;TRIM25;SECTM1;TRIM22	2.73743
	positive regulation of NF-kappaB transcription factor activity (GO:0051092)	AIM2;IRAK2;TRIM5;IL1B;TRIM25;EIF2AK2;TRIM22	2.72115
	regulation of RNA metabolic process (GO:0051252)	OAS1;OAS2;OAS3;OASL	2.71707
	DNA synthesis involved in DNA repair (GO:0000731)	RMI2;TRIM25;UBE2L6;ISG15;BRCA2	2.71327
	regulation of inflammatory response (GO:0050727)	BCL6;TNFAIP6;CASP5;TNFAIP3;FFAR2;JAK2;PIK3AP1;USP18	2.6878
	negative regulation of lipid metabolic process (GO:0045833)	HCAR2;CEACAM1;IL1B	2.68339
	positive regulation of interferon-alpha production (GO:0032727)	IFIH1;STAT1;IRF7	2.68339
	positive regulation of cytokine biosynthetic process (GO:0042108)	IL1B;EBI3;IL27;CD276	2.67594
	negative regulation of protein binding (GO:0032091)	SLPI;LRRK2;IFIT1;DISC1;IFIT2	2.65495
	positive regulation of T cell activation (GO:0050870)	CD274;IL1B;CCL2;PDCD1LG2;CD276	2.62657
	regulation of response to cytokine stimulus (GO:0060759)	IFIH1;IRAK2;PARP9	2.61718
	negative regulation of protein secretion (GO:0050709)	SFRP1;RSAD2;IL1B;RHBDF2	2.59715
	neutrophil degranulation (GO:0043312)	SERPINB10;SIGLEC14;TNFAIP6;ANXA3;GPR84;RETN;MMP8;PLAC8;CEACAM1;SLPI;CLEC5A;C3AR1;CYSTM1;CD59;CD177	2.59386
	regulation of adiponectin secretion (GO:0070163)	HCAR2;IL1B	2.57096
	positive regulation of extrinsic apoptotic signaling pathway via death domain receptors (GO:1902043)	SFRP1;ATF3	2.57096
	phagosome-lysosome fusion (GO:0090385)	RAB20;RAB39A	2.57096
	negative regulation of complement activation (GO:0045916)	SERPING1;C4BPA	2.57096
	telencephalon cell migration (GO:0022029)	LRRK2;FGF13	2.57096
	regulation of cytokine production involved in immune response (GO:0002718)	FFAR3;FFAR2	2.57096
	neutrophil activation involved in immune response (GO:0002283)	SERPINB10;SIGLEC14;TNFAIP6;ANXA3;GPR84;RETN;MMP8;PLAC8;CEACAM1;SLPI;CLEC5A;C3AR1;CYSTM1;CD59;CD177	2.5598
	positive regulation of interferon-gamma production (GO:0032729)	IL1B;EBI3;IL27;CD276	2.55936
	regulation of interferon-gamma production (GO:0032649)	CD274;IL1B;ISG15;PDCD1LG2	2.55936
	positive regulation of lymphocyte proliferation (GO:0050671)	CD274;IL1B;PDCD1LG2;TNFSF13B;CD276	2.54434
	positive regulation of sequence-specific DNA binding transcription factor activity (GO:0051091)	AIM2;TRIM5;ANXA3;IRAK2;IL1B;TRIM25;EIF2AK2;TRIM22;STK3	2.54167
	neutrophil mediated immunity (GO:0002446)	SERPINB10;SIGLEC14;TNFAIP6;ANXA3;GPR84;RETN;MMP8;PLAC8;CEACAM1;SLPI;CLEC5A;C3AR1;CYSTM1;CD59;CD177	2.5262
	negative regulation of immune response (GO:0050777)	IFI16;DHX58;TNFAIP3;TRAFD1	2.52259
	regulation of angiogenesis (GO:0045765)	SFRP1;CEACAM1;FOXC1;ANXA3;STAT1;IL1B;TNFAIP3;PML	2.51557
	response to lipid (GO:0033993)	CXCL10;CXCL11;TRIM6;SLPI;GCH1;FAS;JAK2	2.5021
	cellular response to lipid (GO:0071396)	CD274;CXCL10;SFRP1;TNFAIP3;FFAR3;CCL2;FFAR2;PDCD1LG2	2.50063
	positive regulation of cytokine secretion (GO:0050715)	IFIH1;CD274;TRIM6;CLEC6A;FFAR2	2.49183
	cellular response to interleukin-6 (GO:0071354)	SOCS3;STAT1;JAK2	2.43897
	regulation of MDA-5 signaling pathway (GO:0039533)	DHX58;DDX60	2.42876
	negative regulation of osteoblast proliferation (GO:0033689)	SFRP1;EIF2AK2	2.42876
	regulation of response to biotic stimulus (GO:0002831)	HERC5;TRIM5	2.42876
	regulation by virus of viral protein levels in host cell (GO:0046719)	STAT1;IFIT1	2.42876
	positive regulation of RIG-I signaling pathway (GO:1900246)	DHX58;DDX60	2.42876
	tooth mineralization (GO:0034505)	COL1A1;FAM20A	2.42876
	positive regulation of type I interferon-mediated signaling pathway (GO:0060340)	ZBP1;TRIM6	2.42876
	cytoplasmic pattern recognition receptor signaling pathway (GO:0002753)	IRAK2;TNFAIP3;MAP2K6	2.38534
	cellular response to mechanical stimulus (GO:0071260)	CASP5;IL1B;FAS;TLR5	2.38469
	nucleotide-binding domain, leucine rich repeat containing receptor signaling pathway (GO:0035872)	IRAK2;TNFAIP3;MAP2K6	2.33418
	cellular response to vascular endothelial growth factor stimulus (GO:0035924)	FOXC1;EGR3;MT1G	2.33418
	regulation of viral release from host cell (GO:1902186)	TRIM5;TRIM25;PML	2.33418
	negative regulation of insulin receptor signaling pathway (GO:0046627)	SOCS3;SOCS1;IL1B	2.33418
	negative regulation of defense response (GO:0031348)	TNFAIP6;IFI16;DHX58;TNFAIP3;TRAFD1	2.32096
	myeloid leukocyte differentiation (GO:0002573)	BATF2;IFI16;IL31RA;MT1G	2.32071
	negative regulation of protein ubiquitination (GO:0031397)	DTX3L;TNFAIP3;ISG15;PML	2.32071
	biomineral tissue development (GO:0031214)	COL1A1;FAM20A	2.30774
	positive regulation of chromatin binding (GO:0035563)	DTX3L;PARP9	2.30774
	negative regulation of activated T cell proliferation (GO:0046007)	CD274;PDCD1LG2	2.30774
	phagolysosome assembly (GO:0001845)	RAB20;RAB39A	2.30774
	positive regulation of cAMP-mediated signaling (GO:0043950)	CXCL10;CXCL11	2.30774
	positive regulation of regulatory T cell differentiation (GO:0045591)	SOCS1;BCL6	2.30774
	phospholipid scrambling (GO:0017121)	PLSCR1;PLSCR4	2.30774
	negative regulation of bone remodeling (GO:0046851)	SFRP1;TNFAIP3	2.30774
	glycerol-3-phosphate metabolic process (GO:0006072)	GK;GPD2	2.30774
	positive regulation of binding (GO:0051099)	FOXC1;DTX3L;LRRK2;PARP9;STK3	2.29806
	positive regulation of cAMP metabolic process (GO:0030816)	CXCL10;CXCL11;ADM	2.28529
	negative regulation of cellular response to insulin stimulus (GO:1900077)	SOCS3;SOCS1;IL1B	2.28529
	positive regulation of peptidyl-tyrosine phosphorylation (GO:0050731)	SOCS3;IL31RA;OSM;PARP14;JAK2;PARP9	2.28392
	cellular response to molecule of bacterial origin (GO:0071219)	CD274;CXCL10;TNFAIP3;CCL2;PDCD1LG2	2.23138
	negative regulation of serine-type endopeptidase activity (GO:1900004)	SPINK8;ANXA8	2.20251
	dynamin family protein polymerization involved in membrane fission (GO:0003373)	MX2;MX1	2.20251
	positive regulation of production of molecular mediator of immune response (GO:0002702)	FFAR3;FFAR2	2.20251
	positive regulation of nitric-oxide synthase biosynthetic process (GO:0051770)	CCL2;JAK2	2.20251
	indolalkylamine catabolic process (GO:0046218)	IDO2;IDO1	2.20251
	dynamin family protein polymerization involved in mitochondrial fission (GO:0003374)	MX2;MX1	2.20251
	negative regulation of serine-type peptidase activity (GO:1902572)	SPINK8;ANXA8	2.20251
	regulation of acute inflammatory response (GO:0002673)	C3AR1;OSM;SERPING1;C4BPA;FFAR2;CD59	2.19591
	nucleotide-binding oligomerization domain containing signaling pathway (GO:0070423)	IRAK2;TNFAIP3;MAP2K6	2.19362
	regulation of activated T cell proliferation (GO:0046006)	CD274;IGFBP2;PDCD1LG2	2.15054
	chloride transmembrane transport (GO:1902476)	CLIC4;SLC26A8;SLC1A3;APOL1	2.11857
	macrophage chemotaxis (GO:0048246)	EDNRB;CCL2	2.10951
	regulation of NLRP3 inflammasome complex assembly (GO:1900225)	GBP5;EIF2AK2	2.10951
	tryptophan metabolic process (GO:0006568)	IDO2;IDO1	2.10951
	T cell chemotaxis (GO:0010818)	CXCL10;CXCL11	2.10951
	positive regulation of T cell apoptotic process (GO:0070234)	CD274;IDO1	2.10951
	macrophage migration (GO:1905517)	EDNRB;CCL2	2.10951
	endosomal vesicle fusion (GO:0034058)	SAMD9L;SAMD9	2.10951
	regulation of mitochondrial depolarization (GO:0051900)	LRRK2;IFI6	2.10951
	regulation of neuroblast proliferation (GO:1902692)	LRRK2;DISC1	2.10951
	tryptophan catabolic process (GO:0006569)	IDO2;IDO1	2.10951
	cellular response to drug (GO:0035690)	MT2A;AIM2;IL1B	2.10913
	negative regulation of secretion by cell (GO:1903531)	RSAD2;RHBDF2;OSM	2.10913
	regulation of immune response (GO:0050776)	COL1A1;IFITM1;PLSCR1;BCL6;DHX58;IRF7;FCGR1A;ICAM1;CD276	2.10824
	inflammatory response (GO:0006954)	CXCL10;CXCL11;TNFAIP6;IL1B;CCRL2;C3AR1;FAS;CCL2;NMI	2.0975
	lipid transport (GO:0006869)	ABCA1;CEACAM1;TNFAIP8L3;SLC51A;APOL2	2.08671
	regulation of extrinsic apoptotic signaling pathway (GO:2001236)	TNFSF10;G0S2;FAS;PML	2.06623
	protein trimerization (GO:0070206)	TRIM6;MLKL;TRIM22	2.03085
	regulation of non-canonical Wnt signaling pathway (GO:2000050)	SFRP1;RNF213	2.02626
	negative regulation of peptide secretion (GO:0002792)	RSAD2;RHBDF2	2.02626
	regulation of chromatin binding (GO:0035561)	DTX3L;PARP9	2.02626
	cellular response to interferon-beta (GO:0035458)	TRIM6;STAT1	2.02626
	regulation of serine-type endopeptidase activity (GO:1900003)	SPINK8;ANXA8	2.02626
	activation of MAPKK activity (GO:0000186)	LRRK2;EIF2AK2;STK3	1.99379
	positive regulation of leukocyte migration (GO:0002687)	CXCL10;CXCL11;ICAM1	1.95801
	negative regulation of T cell activation (GO:0050868)	CD274;CEACAM1;PDCD1LG2	1.95801
	regulation of insulin receptor signaling pathway (GO:0046626)	SOCS3;SOCS1;IL1B	1.95801
	regulation of double-strand break repair via nonhomologous end joining (GO:2001032)	DTX3L;PARP9	1.95098
	regulation of nitric-oxide synthase biosynthetic process (GO:0051769)	CCL2;JAK2	1.95098
	positive regulation of interleukin-1 production (GO:0032732)	AIM2;IFI16	1.95098
	regulation of viral life cycle (GO:1903900)	LAMP3;TRIM25	1.95098
	PERK-mediated unfolded protein response (GO:0036499)	CCL2;ATF3	1.95098
	cellular response to fatty acid (GO:0071398)	FFAR3;FFAR2	1.95098
	inorganic anion transmembrane transport (GO:0098661)	CLIC4;SLC26A8;SLC1A3;APOL1	1.94422
	regulation of primary metabolic process (GO:0080090)	HELZ2;ABCA1;LACTB;ACSL1;G0S2;TNFAIP8L3	1.91471
	negative regulation of epithelial cell proliferation (GO:0050680)	CEACAM1;SFRP1;STAT1;BRCA2	1.89863
	plasma membrane organization (GO:0007009)	PLSCR1;MYOF;PLSCR4	1.88995
	regulation of interleukin-1 beta production (GO:0032651)	AIM2;IFI16	1.88233
	cellular response to exogenous dsRNA (GO:0071360)	IFIH1;IFIT1	1.88233
	negative regulation of viral release from host cell (GO:1902187)	TRIM5;PML	1.88233
	toll-like receptor 9 signaling pathway (GO:0034162)	IRAK2;PIK3AP1	1.88233
	motile cilium assembly (GO:0044458)	DNAAF1;RSPH9	1.88233
	negative regulation of hormone secretion (GO:0046888)	IL1B;OSM	1.88233
	response to fatty acid (GO:0070542)	FFAR3;FFAR2	1.88233
	negative regulation of interleukin-10 production (GO:0032693)	CD274;PDCD1LG2	1.88233
	extrinsic apoptotic signaling pathway (GO:0097191)	SORT1;G0S2;FAS;JAK2	1.87646
	positive regulation of multi-organism process (GO:0043902)	DHX58;LHFPL2;DDX60	1.85755
	regulation of epithelial to mesenchymal transition (GO:0010717)	COL1A1;SFRP1;FOXC1;IL1B	1.8547
	membrane depolarization during action potential (GO:0086010)	SCN9A;CACNA1E;KCNJ2	1.82616
	positive regulation of cellular catabolic process (GO:0031331)	DTX3L;LRRK2;IL1B;ZC3HAV1;TRIM22	1.81941
	regulation of defense response to virus (GO:0050688)	HERC5;TNFAIP3	1.81928
	negative regulation of T cell receptor signaling pathway (GO:0050860)	CEACAM1;GBP1	1.81928
	cellular response to starvation (GO:0009267)	SFRP1;IFI16;LRRK2;EIF2AK2;FAS	1.80334
	protein homooligomerization (GO:0051260)	GBP5;RNF213;MLKL;GCH1;TOR1B;GBP1;KCNJ2	1.80313
	positive regulation of epithelial to mesenchymal transition (GO:0010718)	COL1A1;FOXC1;IL1B	1.76616
	cellular response to interleukin-1 (GO:0071347)	IL1RN;SFRP1;IRAK2;IL1B;CCL2;MAP2K6	1.76589
	negative regulation of interleukin-2 production (GO:0032703)	TNFAIP3;GBP1	1.76102
	negative regulation of lipid catabolic process (GO:0050995)	HCAR2;IL1B	1.76102
	positive regulation of double-strand break repair (GO:2000781)	DTX3L;PARP9	1.76102
	regulation of fertilization (GO:0080154)	SPINK8;LHFPL2	1.76102
	cellular response to tumor necrosis factor (GO:0071356)	SFRP1;AIM2;STAT1;FAS;CCL2;JAK2;TNFSF13B	1.75842
	regulation of peptide hormone secretion (GO:0090276)	IL1B;FFAR3;FFAR2;CACNA1E	1.75152
	chloride transport (GO:0006821)	CLIC4;SLC26A8;SLC1A3;APOL1	1.75152
	positive regulation of MAPK cascade (GO:0043410)	CCR1;TRIM5;LRRK2;OSM;EIF2AK2;FAS;CCL2;TNFAIP8L3;ICAM1	1.74025
	regulation of protein modification process (GO:0031399)	SOCS1;STAT2;PML	1.7096
	translesion synthesis (GO:0019985)	TRIM25;UBE2L6;ISG15	1.7096
	lipopolysaccharide-mediated signaling pathway (GO:0031663)	IL1B;CCL2	1.70691
	cellular response to dsRNA (GO:0071359)	IFIH1;IFIT1	1.70691
	regulation of RIG-I signaling pathway (GO:0039535)	DHX58;DDX60	1.70691
	T cell migration (GO:0072678)	CXCL10;CXCL11	1.70691
	regulation of osteoblast proliferation (GO:0033688)	SFRP1;EIF2AK2	1.70691
	regulation of stem cell proliferation (GO:0072091)	LRRK2;EIF2AK2	1.70691
	regulation of immune effector process (GO:0002697)	HERC5;C3AR1;SERPING1;C4BPA;CD59	1.69615
	positive regulation of apoptotic signaling pathway (GO:2001235)	TNFSF10;G0S2;FAS;PML	1.69376
	negative regulation of antigen receptor-mediated signaling pathway (GO:0050858)	CEACAM1;GBP1	1.65643
	regulation of lipid catabolic process (GO:0050994)	HCAR2;IL1B	1.65643
	positive regulation of monocyte chemotaxis (GO:0090026)	CCR1;CXCL10	1.65643
	negative regulation of B cell activation (GO:0050869)	SFRP1;TNFAIP3	1.65643
	positive regulation of response to biotic stimulus (GO:0002833)	DHX58;DDX60	1.65643
	lymphocyte chemotaxis (GO:0048247)	CXCL10;CXCL11;CCL2	1.65612
	positive regulation of interleukin-8 production (GO:0032757)	IL1B;FFAR2;TLR5	1.65612
	activation of cysteine-type endopeptidase activity involved in apoptotic process (GO:0006919)	CASP5;TNFSF10;FAS;JAK2	1.63879
	protein polymerization (GO:0051258)	TRIM6;JAK2;FGF13	1.63046
	negative regulation of growth (GO:0045926)	MT2A;SFRP1;BCL6;MT1G;PML	1.61101
	establishment or maintenance of apical/basal cell polarity (GO:0035088)	CLIC4;SCARF1	1.60915
	regulation of cAMP-mediated signaling (GO:0043949)	CXCL10;CXCL11	1.60915
	negative regulation of protein transport (GO:0051224)	RSAD2;RHBDF2	1.60915
	interleukin-12-mediated signaling pathway (GO:0035722)	SERPINB2;JAK2;LMNB1	1.60546
	cellular response to interleukin-12 (GO:0071349)	SERPINB2;JAK2;LMNB1	1.60546
	regulation of cell proliferation (GO:0042127)	IFITM1;IL31RA;OSM;EIF2AK2;BRCA2;IFIT3;PML;TNFSF13B;FOSL1;CXCL10;SFRP1;CXCL11;BCL6;IL1B;ALDH1A2;FAS;JAK2	1.58653
	postreplication repair (GO:0006301)	TRIM25;UBE2L6;ISG15	1.58111
	negative regulation of JAK-STAT cascade (GO:0046426)	SOCS3;SOCS1;PARP14	1.58111
	tumor necrosis factor-mediated signaling pathway (GO:0033209)	AIM2;STAT1;FAS;JAK2;TNFSF13B	1.57056
	protein ADP-ribosylation (GO:0006471)	PARP14;PARP9	1.56472
	negative regulation of proteolysis involved in cellular protein catabolic process (GO:1903051)	LAMP3;PML	1.56472
	regulation of heterotypic cell-cell adhesion (GO:0034114)	IL1RN;IL1B	1.56472
	positive regulation of mononuclear cell migration (GO:0071677)	CCR1;CXCL10	1.56472
	cellular response to zinc ion (GO:0071294)	MT2A;MT1G	1.56472
	positive regulation of toll-like receptor signaling pathway (GO:0034123)	RSAD2;TLR5	1.56472
	regulation of mitochondrial fission (GO:0090140)	STAT2;LRRK2	1.56472
	positive regulation of transcription regulatory region DNA binding (GO:2000679)	FOXC1;TRIM6	1.56472
	negative regulation of macromolecule metabolic process (GO:0010605)	CCR1;SFRP1;TRIM6;PARP14;PARP9	1.55737
	negative regulation of mitotic cell cycle (GO:0045930)	FOXC1;FAP;BCL6	1.55737
	pattern recognition receptor signaling pathway (GO:0002221)	IRAK2;LRRC70;FFAR2	1.55737
	negative regulation of cell proliferation (GO:0008285)	IFITM1;SFRP1;IL1B;ALDH1A2;OSM;EIF2AK2;TNFAIP3;JAK2;IFIT3;PML	1.55291
	protein oligomerization (GO:0051259)	TRIM6;RNF213;GCH1;TNFAIP3;TOR1B;GBP1;TRIM22	1.52525
	regulation of regulatory T cell differentiation (GO:0045589)	SOCS1;BCL6	1.52283
	intrinsic apoptotic signaling pathway in response to DNA damage by p53 class mediator (GO:0042771)	IFI16;PML	1.52283
	aromatic amino acid family catabolic process (GO:0009074)	IDO2;IDO1	1.52283
	regulation of toll-like receptor signaling pathway (GO:0034121)	IRF7;TLR5	1.52283
	negative regulation of interferon-gamma production (GO:0032689)	CD274;PDCD1LG2	1.52283
	toll-like receptor signaling pathway (GO:0002224)	IRAK2;LRRC70;TLR5;PIK3AP1	1.52025
	regulation of protein processing (GO:0070613)	LRRK2;C3AR1;SERPING1;C4BPA;CD59	1.50604
	organic substance transport (GO:0071702)	ABCA1;TCN2;TAP1;APOL2	1.50433
	regulation of programmed cell death (GO:0043067)	BCL6;STAT1;LRRK2;FAS;JAK2;BCL2L14;STK3;MAP2K6	1.50424
	negative regulation of translation (GO:0017148)	MOV10;SAMD4A;EIF2AK2;IGF2BP3	1.48865
	positive regulation of protein complex assembly (GO:0031334)	FOSL1;GBP5;AIM2;CDC42EP2	1.48865
	mesoderm development (GO:0007498)	SECTM1;JAK2	1.48322
	mitochondrial fission (GO:0000266)	MX2;MX1	1.48322
	negative regulation of viral process (GO:0048525)	IFITM3;STAT1	1.48322
	cellular response to copper ion (GO:0071280)	MT2A;MT1G	1.48322
	negative regulation of cellular protein metabolic process (GO:0032269)	EDNRB;SAMD4A;EIF2AK2;IGF2BP3	1.47319
	regulation of DNA binding (GO:0051101)	FOXC1;IFI16;JAK2	1.46804
	positive regulation of MAP kinase activity (GO:0043406)	IRAK2;LRRK2;IL1B;EIF2AK2;STK3;MAP2K6	1.45754
	cellular response to oxygen-containing compound (GO:1901701)	CD274;CXCL10;SFRP1;FFAR3;TNFAIP3;CCL2;FFAR2;PDCD1LG2	1.45592
	regulation of ERBB signaling pathway (GO:1901184)	CEACAM1;RHBDF2	1.44569
	regulation of monocyte chemotaxis (GO:0090025)	CCR1;CXCL10	1.44569
	adenylate cyclase-modulating G-protein coupled receptor signaling pathway (GO:0007188)	ABCA1;RGS1;FFAR3;ADM;GPR84	1.43304
	action potential (GO:0001508)	SCN9A;CACNA1E;KCNJ2	1.42645
	membrane fusion (GO:0061025)	MX2;MX1;STX11	1.42645
	negative regulation of signal transduction in absence of ligand (GO:1901099)	IL1B;IFI6	1.41003
	negative regulation of extrinsic apoptotic signaling pathway in absence of ligand (GO:2001240)	IL1B;IFI6	1.41003
	positive regulation of monooxygenase activity (GO:0032770)	GCH1;IL1B	1.41003
	regulation of cellular catabolic process (GO:0031329)	IFI16;LRRK2;LAMP3	1.40635
	positive regulation of cysteine-type endopeptidase activity (GO:2001056)	AIM2;IFI16;TNFSF10	1.40635
	cellular response to fibroblast growth factor stimulus (GO:0044344)	SFRP1;EGR3;GALNT3;CCL2	1.39919
	interleukin-1-mediated signaling pathway (GO:0070498)	IL1RN;IRAK2;IL1B;MAP2K6	1.38501
	activation of protein kinase activity (GO:0032147)	IRAK2;IL1B;LRRK2;EIF2AK2;JAK2;STK3;MAP2K6	1.38392
	positive regulation of immune effector process (GO:0002699)	DHX58;DDX60	1.37609
	cellular modified amino acid biosynthetic process (GO:0042398)	PLSCR1;PLOD2	1.37609
	axoneme assembly (GO:0035082)	DNAAF1;RSPH9	1.37609
	regulation of transmembrane transport (GO:0034762)	KCNJ10;KCNJ2	1.37609
	negative regulation of endothelial cell apoptotic process (GO:2000352)	TNFAIP3;ICAM1	1.37609
	mucosal immune response (GO:0002385)	FFAR3;FFAR2	1.37609
	negative regulation of T cell proliferation (GO:0042130)	CD274;PDCD1LG2	1.37609
	cellular response to growth factor stimulus (GO:0071363)	SFRP1;FOXC1;EGR3;MT1G;CCL2	1.37561
	regulation of cellular component organization (GO:0051128)	ABCA1;CEACAM1;RAB20;KIAA1958;CD177	1.36447
	response to tumor necrosis factor (GO:0034612)	SFRP1;GCH1;CCL2;JAK2	1.35723
	response to copper ion (GO:0046688)	MT2A;MT1G	1.34372
	regulation of interleukin-10 production (GO:0032653)	CD274;PDCD1LG2	1.34372
	negative regulation of locomotion (GO:0040013)	TRIM5;PML	1.34372
	positive regulation of calcium ion transmembrane transport (GO:1904427)	CXCL10;CXCL11	1.34372
	sterol metabolic process (GO:0016125)	ABCA1;CYP19A1;APOL2	1.33026
	cellular response to metal ion (GO:0071248)	MT2A;CLIC4;LRRK2;MT1G	1.31697
	positive regulation of interferon-beta production (GO:0032728)	IFIH1;IRF7	1.3128
	strand displacement (GO:0000732)	RMI2;BRCA2	1.3128
	regulation of T cell receptor signaling pathway (GO:0050856)	CEACAM1;GBP1	1.3128
	endocrine system development (GO:0035270)	MDK;HESX1	1.3128
	cell chemotaxis (GO:0060326)	DOCK4;EGR3;C3AR1	1.31223
	positive regulation of protein binding (GO:0032092)	DTX3L;LRRK2;STK3	1.31223
	muscle organ development (GO:0007517)	CXCL10;EGR3;VAMP5	1.31223
	metal ion transport (GO:0030001)	KCNJ10;SCN9A;FGF13;KCNJ2	1.3039
	muscle contraction (GO:0006936)	MYBPC2;NMUR1;SCN4A	-1.31421
	extracellular matrix organization (GO:0030198)	ADAMTS5;MMP11;LAMA5;COL19A1	-1.31832
	sodium ion transport (GO:0006814)	SCN4A;SLC5A10	-1.33018
	alpha-amino acid biosynthetic process (GO:1901607)	GATM	-1.33135
	cellular response to prostaglandin E stimulus (GO:0071380)	PTGDR	-1.33135
	nucleoside diphosphate phosphorylation (GO:0006165)	AK8	-1.33135
	positive regulation of membrane potential (GO:0045838)	TCL1A	-1.33135
	regulation of PERK-mediated unfolded protein response (GO:1903897)	BOK	-1.33135
	negative regulation of hippo signaling (GO:0035331)	DLG5	-1.33135
	nucleotide phosphorylation (GO:0046939)	AK8	-1.33135
	acid secretion (GO:0046717)	ABCB4	-1.33135
	multi-ciliated epithelial cell differentiation (GO:1903251)	CCDC78	-1.33135
	negative regulation of keratinocyte proliferation (GO:0010839)	PTPRK	-1.38807
	positive regulation of lipid transport (GO:0032370)	ABCB4	-1.38807
	nucleoside diphosphate metabolic process (GO:0009132)	AK8	-1.38807
	positive regulation of killing of cells of other organism (GO:0051712)	FCER2	-1.38807
	activation of cysteine-type endopeptidase activity involved in apoptotic process by cytochrome c (GO:0008635)	BOK	-1.38807
	regulation of cell migration (GO:0030334)	DLG5;PTPRK;LDB2;PODN;LGR6	-1.39088
	cytoskeleton organization (GO:0007010)	LAMA5;RTKN;PAK6	-1.404
	negative regulation of cell migration (GO:0030336)	DLG5;PTPRK;PODN	-1.44803
	hindlimb morphogenesis (GO:0035137)	AFF3	-1.45374
	vocal learning (GO:0042297)	CNTNAP2	-1.45374
	bile acid secretion (GO:0032782)	ABCB4	-1.45374
	immune response-inhibiting cell surface receptor signaling pathway (GO:0002767)	KIR2DL1	-1.45374
	positive regulation of phospholipid transport (GO:2001140)	ABCB4	-1.45374
	imitative learning (GO:0098596)	CNTNAP2	-1.45374
	fructose 6-phosphate metabolic process (GO:0006002)	GFPT2	-1.45374
	positive regulation of mitochondrial membrane potential (GO:0010918)	TCL1A	-1.45374
	enzyme linked receptor protein signaling pathway (GO:0007167)	BLK;ERBB2;GFRA2	-1.4571
	positive regulation of protein serine/threonine kinase activity (GO:0071902)	TCL1B;TCL1A;ERBB2	-1.47552
	aminoglycan biosynthetic process (GO:0006023)	SDC2;HS3ST1	-1.51361
	inorganic anion transport (GO:0015698)	SLC4A10;NMUR1	-1.54933
	negative regulation of ERBB signaling pathway (GO:1901185)	ERBB2;SPRY1	-1.56787
	monovalent inorganic cation transport (GO:0015672)	KCNG1;SCN4A;SLC5A10	-1.61583
	metal ion transport (GO:0030001)	KCNG1;SCN4A;SLC5A10	-1.64881
	antigen processing and presentation of peptide antigen via MHC class II (GO:0002495)	CTSF;HLA-DOA;HLA-DQA1	-1.68297
	cell morphogenesis involved in neuron differentiation (GO:0048667)	LINGO2;LRFN2;SDC2	-1.69462
	negative regulation of cell motility (GO:2000146)	DLG5;PTPRK;PODN	-1.69462
	antigen processing and presentation of exogenous peptide antigen (GO:0002478)	CTSF;HLA-DOA;HLA-DQA1	-1.69462
	antigen processing and presentation of exogenous peptide antigen via MHC class II (GO:0019886)	CTSF;HLA-DOA;HLA-DQA1	-1.69462
	positive regulation of protein kinase activity (GO:0045860)	TCL1B;TCL1A;DOK7;PAK6	-1.70912
	regulation of smoothened signaling pathway (GO:0008589)	DLG5;GLI1	-1.71254
	antigen receptor-mediated signaling pathway (GO:0050851)	BLK;CD79B;CD79A;CD19;HLA-DQA1	-1.72485
	neuron projection morphogenesis (GO:0048812)	LINGO2;LRFN2;CNTNAP2;SDC2	-1.78581
	axon guidance (GO:0007411)	SPON2;NCAM1;GFRA2;RNF165	-1.83069
	axonogenesis (GO:0007409)	LINGO2;SPON2;LRFN2;NCAM1;GFRA2	-1.96715
	cell-substrate adherens junction assembly (GO:0007045)	LAMA5;PTPRK	-2.29699
	focal adhesion assembly (GO:0048041)	LAMA5;PTPRK	-2.29699
	cellular defense response (GO:0006968)	GNLY;KLRC3;CD19	-2.34431
	regulation of B cell receptor signaling pathway (GO:0050855)	BLK;PAX5	-2.34645
	B cell differentiation (GO:0030183)	CD79B;CD79A;CR2	-2.43524
	B cell receptor signaling pathway (GO:0050853)	BLK;CD79B;CD79A;CD19	-2.46004
	positive regulation of smoothened signaling pathway (GO:0045880)	DLG5;GLI1	-2.58115
	regulation of antigen receptor-mediated signaling pathway (GO:0050854)	BLK;PAX5	-2.65201
	lymphocyte proliferation (GO:0046651)	CD79A;CR2;MS4A1	-2.89595
	B cell activation (GO:0042113)	CD79B;CD79A;CR2;MS4A1	-3.02458
	lymphocyte differentiation (GO:0030098)	BLK;CD79B;CD79A;CR2	-3.02458
	B cell proliferation (GO:0042100)	CD79A;CR2;MS4A1	-3.17373
	regulation of immune response (GO:0050776)	KIR2DS1;CD19;KLRF1;SH2D1B;KIR3DL1;KIR2DL1;KLRC1;CD1C;KIR2DL2;CD200	-5.58476
