# Supplementary material for: Early Pharmacodynamic Changes Measured Using RNA Sequencing of Peripheral Blood from Patients in a Phase I Study with Mitazalimab, a Potent CD40 Agonistic Monoclonal Antibody
Source: Cells. 2023 Sep 27;12(19):2365. doi: 10.3390/cells12192365 (PMC10572020; doi:10.3390/cells12192365)
Supplement: Supplementary file 1 [file cells-12-02365-s001.zip › Table S2. DEG between mitazalimab with or without CS pretreatment.xlsx]

## Sheet: DEG
	DEG between mitazalimab only and samples pretreated with corticosteroids
	(at 600 µg/kg mitazalimab)
	Gene	log2FoldChange	padj
	IFI27	3.65783	0.013753
	ALOX15B	3.42643	0.000251817
	TRPV6	3.28201	0.0145179
	ATOH8	2.42162	0.0189634
	LPL	2.36457	0.02644
	MRC1	2.09915	0.0276914
	C1orf127	2.06235	0.00271941
	OLFML2A	2.00318	0.0282355
	IER5L	1.91925	0.00431596
	SORCS2	1.79642	0.00349027
	MYO7A	1.65044	0.0369925
	STARD13	1.56591	0.0308752
	MARVELD1	1.5361	0.000219357
	STEAP3	1.51428	3.73292e-06
	GFRA2	1.48767	0.0468886
	SERPINF2	1.47069	0.0101325
	ARHGAP22	1.46184	0.00724708
	TSPAN4	1.44437	0.00412801
	NYNRIN	1.3898	0.00349027
	ALDH1A1	1.37699	0.00408518
	PLEC	1.36308	0.0076689
	AMOTL1	1.33991	0.00592694
	CPM	1.33734	0.00195618
	ABCC6	1.27801	0.0324882
	SMTN	1.27143	0.00155508
	ELF3	1.25671	0.0421523
	ANG	1.22881	0.00450767
	HOMER3	1.0939	0.0276914
	FOLR2	1.07826	0.0381492
	PLD3	1.07314	0.000620053
	LTB4R2	1.06456	0.0168043
	CEBPD	1.04153	0.00870829
	BACE1	1.03914	0.0358674
	SLC27A1	1.03863	0.0357665
	ZNF219	1.01064	0.00863076
	CYLD	-1.004	0.00680881
	USPL1	-1.008	0.0189634
	RHOQ	-1.01392	0.046903
	METTL4	-1.02823	0.00349027
	MAT2B	-1.03689	0.0123357
	MPZL2	-1.047	0.00431596
	PARP3	-1.04734	0.0219469
	AMIGO2	-1.05958	0.00171424
	BIRC3	-1.0696	0.046903
	BBX	-1.07689	0.013365
	SEMA7A	-1.10262	0.0377046
	ARHGAP5	-1.1133	0.0383135
	TMEM62	-1.11392	0.0305073
	POMP	-1.12885	0.0293549
	NDUFB6	-1.16223	0.0273446
	FAM8A1	-1.1816	0.0352467
	SERPINB9	-1.20316	0.0139755
	RPS6KA5	-1.22525	0.00450767
	PLAC8	-1.22915	0.0235571
	CYSLTR1	-1.25823	0.0158248
	C21orf91	-1.25947	0.0117411
	CD46	-1.27375	0.00454519
	FAM171A1	-1.30605	0.0381825
	IL2RA	-1.30855	0.0126368
	CASP7	-1.36593	0.0358674
	MEOX1	-1.39534	0.00592694
	RHOH	-1.39797	0.0161872
	WDFY1	-1.41049	0.0484019
	NBN	-1.41682	0.0162295
	MTUS1	-1.41944	0.0436052
	POLB	-1.47837	0.0349864
	TNFSF13B	-1.48035	0.0390213
	STX17	-1.48767	0.00469763
	LYSMD2	-1.49148	0.0358674
	CD38	-1.49191	0.0486423
	SUSD4	-1.49628	0.0202951
	GK	-1.49831	0.0414326
	CNR2	-1.5159	0.0428475
	PDE4B	-1.52953	0.0147641
	SLAMF7	-1.5353	0.0253614
	TNFSF10	-1.55579	0.0428475
	HAPLN3	-1.55914	0.00870829
	CD2AP	-1.56297	0.0424076
	PARP11	-1.56929	0.0276744
	FAS	-1.57327	0.0358674
	DTX3L	-1.57368	0.0276914
	TOR1B	-1.6193	0.0442073
	PARP9	-1.62169	0.0358674
	NT5C3A	-1.62173	0.0204839
	BACH2	-1.6265	0.0164835
	ANXA2R	-1.65636	0.0299863
	OR2B6	-1.65866	0.0381492
	NAP1L2	-1.67298	0.0412928
	RBM43	-1.67415	0.0259644
	ASPHD2	-1.67576	0.0107399
	GK3P	-1.69211	0.0288448
	PSME2	-1.69542	0.0315244
	DDX60L	-1.70362	0.0196747
	FLVCR1	-1.72614	0.00645898
	PHF11	-1.72857	0.00349027
	MID2	-1.74958	0.0409216
	RGMB	-1.77355	0.0369925
	RASGRP3	-1.7773	0.0121226
	SLC39A8	-1.80258	0.00349689
	TIFA	-1.80378	0.0364171
	TRIM5	-1.80667	0.0276914
	LAMP5	-1.81835	0.00450767
	AP1S3	-1.82201	0.0354476
	RIPK2	-1.84856	0.00717951
	APOL2	-1.8601	0.0328814
	SAMD9	-1.89077	0.0176774
	FANCA	-1.9069	0.0357062
	PGAP1	-1.90919	0.0432994
	NUB1	-1.9397	0.0221543
	GCH1	-1.9484	0.0168043
	GAS8	-1.95209	0.0332456
	PRR5L	-1.98052	0.0365912
	PPM1K	-1.98461	0.00349027
	DOCK4	-1.98684	0.0307935
	EIF2AK2	-1.9916	0.0369925
	HERC6	-2.00175	0.0341141
	STAP1	-2.01082	0.0425467
	RNF213	-2.01195	0.046903
	TIMM10	-2.04399	0.0414326
	GCSAML	-2.05252	0.0276744
	RNF144A	-2.07561	0.000471915
	TNFAIP6	-2.07906	0.0364171
	FBXO6	-2.08338	0.0235571
	RTKN2	-2.09475	0.00441451
	PARP12	-2.10868	0.0300336
	TAP2	-2.11328	0.0132305
	PMP22	-2.13268	0.0367023
	STAT1	-2.16195	0.000715953
	FFAR3	-2.17373	0.0315244
	ISG20	-2.22783	0.0174553
	PI3	-2.25388	0.0421523
	DUSP5	-2.27406	0.00792082
	DHX58	-2.30852	0.0372299
	CCR3	-2.35072	0.00482057
	SLC45A3	-2.35112	0.00182625
	GRAMD1B	-2.37214	0.0324909
	LRRN3	-2.37959	0.0147973
	EDAR	-2.3828	0.0425467
	XRN1	-2.39354	0.00317136
	TSPAN13	-2.39739	0.00142888
	CEACAM1	-2.39887	0.0235571
	SP140	-2.40193	0.00792082
	SDC2	-2.41623	0.0356129
	METTL7B	-2.42402	0.0124436
	PTGDR2	-2.42989	0.00592694
	STAT2	-2.43916	0.0103209
	MT2A	-2.44014	0.00349027
	ZNF662	-2.46516	0.0283393
	ENPP2	-2.48324	0.00123453
	UBE2L6	-2.49485	0.00563261
	RTP4	-2.50455	0.0131504
	IFIH1	-2.50509	0.00867721
	MED12L	-2.50652	0.0176774
	KRT7	-2.50893	0.0231571
	TNFRSF21	-2.52577	0.00227846
	SPATS2L	-2.5267	0.0305073
	IL31RA	-2.53576	0.0354476
	XAF1	-2.55383	0.0204839
	PML	-2.55916	0.0189634
	OAS1	-2.58891	0.0126048
	PVALB	-2.592	0.00870829
	VLDLR	-2.6158	0.00348621
	MOV10	-2.64135	0.0132305
	EPSTI1	-2.65249	0.0442073
	DDX60	-2.65792	0.016375
	GATA2	-2.66879	0.00113955
	LAP3	-2.68606	0.0417988
	OAS2	-2.69249	0.0168043
	IFI35	-2.73809	0.0076689
	APOL6	-2.74108	0.00080962
	APOL1	-2.75777	0.00724708
	CCL23	-2.77904	0.0349864
	SAMD9L	-2.78897	0.00127108
	NTRK1	-2.79153	0.0364171
	CA8	-2.82802	0.0101325
	GCNT4	-2.84023	0.0139755
	KLHL29	-2.86787	0.0417988
	IFIT2	-2.87739	0.0375812
	NRN1	-2.89176	0.0176784
	SMPD3	-2.89178	0.00127108
	IFIT3	-2.95397	0.0276914
	PARP14	-2.99004	0.00195618
	AKAP12	-3.10854	0.00155508
	IL5RA	-3.11234	0.000123177
	CD274	-3.14172	0.0278422
	GBP6	-3.14342	0.0407486
	PDCD1LG2	-3.1538	0.00425774
	LIF	-3.16497	0.0276914
	SLC12A3	-3.23041	0.0379507
	STAC	-3.26943	0.0315244
	GBP1	-3.27059	0.00605508
	OAS3	-3.38667	0.0399501
	SYNPO2	-3.46633	0.0113253
	CPA3	-3.48375	0.000300498
	CACNG8	-3.48472	0.00141183
	ENPP3	-3.55561	0.00349027
	CMPK2	-3.60376	0.0211017
	EXOC3L1	-3.62287	0.0276914
	MS4A2	-3.65462	0.00271941
	SERPING1	-3.67432	0.00820045
	HDC	-3.73791	0.000251817
	GBP5	-3.77032	0.00141933
	CLC	-3.78945	3.4278e-06
	ISG15	-3.79641	0.0262496
	ANKRD22	-3.86558	0.00127108
	RMI2	-3.94412	0.00454519
	HERC5	-3.9538	0.00633606
	CDON	-3.98719	0.0250935
	GBP4	-4.1105	0.00080962
	RSAD2	-4.14588	0.0250935
	BATF2	-4.15576	0.00349027
	FAP	-4.19328	0.0235571
	IL17RB	-4.25672	0.0174311
	COL19A1	-4.31322	0.0358674
	CYP11A1	-4.31703	0.0308752
	CACNG6	-4.34384	0.000251817
	P2RY14	-4.38222	0.000251817
	SOCS1	-4.48501	0.00229214
	ATF3	-4.54829	0.00148053
	ETV7	-4.8407	0.000620053
	CCL2	-4.93052	0.0124436
	OLIG2	-5.01471	4.70967e-05
	ALOX15	-5.07322	0.00127108
	COL26A1	-5.25391	0.020721
	PRSS33	-5.26545	2.67703e-05
	GGT5	-5.28488	0.000123177
	BCL2L14	-5.3799	0.00141933
	SIGLEC8	-6.47424	6.37537e-08
	LAMP3	-6.96394	3.4278e-06
	TBC1D3G	-6.97782	0.0313821
	IDO1	-8.04451	6.37537e-08
