# Supplementary material for: Early Pharmacodynamic Changes Measured Using RNA Sequencing of Peripheral Blood from Patients in a Phase I Study with Mitazalimab, a Potent CD40 Agonistic Monoclonal Antibody
Source: Cells. 2023 Sep 27;12(19):2365. doi: 10.3390/cells12192365 (PMC10572020; doi:10.3390/cells12192365)
Supplement: Supplementary file 1 [file cells-12-02365-s001.zip › Table S4. ISG cMo gene list.xlsx]

## Sheet: Sheet1
	Mulder et al ISG cMo
	CXCL10
	ISG15
	IFIT1
	CCL8
	IFIT2
	IFIT3
	RSAD2
	TNFSF10
	ISG20
	CCL2
	IFI44L
	APOBEC3A
	IFITM3
	IFI6
	GBP1
	CXCL11
	HERC5
	LY6E
	IL1RN
	IFI44
	PARP14
	OASL
	CMPK2
	RABGAP1L
	OAS3
	SAMD9L
	EPSTI1
	IFI35
	IFI27
	XAF1
	STAT1
	RNF213
	VAMP5
	OAS1
	IRF7
	USP18
	OAS2
	EIF2AK2
	TNFSF13B
	DDX58
	SSB
	WARS
	DYNLT1
	IFITM1
	SAMD9
	GBP4
	MT2A
	LAP3
	IL4I1
	GCH1
	SP110
	UBE2L6
	NEXN
	APOL6
	IFIH1
	DDX60L
	IFITM2
	NMI
	TAP1
	GBP5
	ATF5
	TIMP1
	TRIM22
	IFI16
	PARP9
	PLSCR1
	IDO1
	GIMAP4
	PSMB9
	PSME2
	PML
	GMPR
	MNDA
	BST2
	SERPING1
	ANKRD22
	SPATS2L
	STAT2
	XRN1
	PNPT1
	BAZ1A
	CHMP5
	SP100
	NUPR1
	PSMA4
	CCR1
	PSMB8
	PLAC8
	IRF1
	ZC3HAV1
	ADAR
	RBCK1
	CD69
	NAPA
	PLEK
	GLUL
	LGALS9
